# Supplementary material for: Overall and stage-specific survival of patients with screen-detected colorectal cancer in European countries: A population-based study in 9 countries
Source: PubMed Central journal article supplement — Lancet Reg Health Eur. 2022 Jul 6;21:100458. doi: 10.1016/j.lanepe.2022.100458 (PMC9272368; doi:10.1016/j.lanepe.2022.100458), 2022-07-06
Supplement: mmc1.pdf [file mmc1.pdf]

## **Supplementary appendix**

Supplement to: Overall and stage-specific survival of patients with screen-detected colorectal cancer in European countries: a population-based study in 9 countries

### **Table of Contents:**

#### **Appendix Methods**

#### **Appendix Tables**

Appendix Table 1. Data sources and data quality indicators.

Appendix Table 2. Data sources and definitions of screen-detected cancers in the included countries/ regions.

Appendix Table 3. Characteristics and parameters of organised colorectal cancer screening programmes in the countries/ regions included in the study.

Appendix Table 4. Demographic and tumour characteristics of colorectal cancer patients by mode of detection and country.

Appendix Table 5. Last follow-up dates, median follow-up time and interquartile range by country/ region.

Appendix Table 6. Overall survival of colorectal cancer patients at 3 and 5 years after diagnosis according to mode of detection, by country, sex, age, stage, and tumour location.

Appendix Table 7. Disease-specific survival of colorectal cancer patients at 3 and 5 years after diagnosis according to mode of detection, by country, sex, age, stage, and tumour location.

#### **References**

## Appendix Methods

### **Numbers of cases with unknown cause of death that were excluded from CRC-specific survival analyses**

*England:* among all CRC patients, regardless of mode of detection – 1752 (2.7% of deaths); among patients with screen-detected CRC – 259 (4.9% of deaths); among patients with non-screen-detected CRC – 1493 (2.5% of deaths).

*Ireland:* cause of death information was available for all deceased patients.

*Italy (Turin):* among all CRC patients, regardless of mode of detection – 60 (6.6% of deaths); among patients with screen-detected CRC – 7 (11.7% of deaths); among patients with non-screen-detected CRC – 53 (6.2% of deaths).

*Slovenia:* among all CRC patients, regardless of mode of detection – 13 (0.8% of deaths); among patients with screen-detected CRC – 2 (0.7% of deaths); among patients with non-screen-detected CRC – 11 (0.8% of deaths).

*Spain (Basque Country, Girona, and Tarragona):* among all CRC patients, regardless of mode of detection: 143 (5.7% of deaths); among patients with screen-detected CRC – 10 (2.8% of deaths); among patients with non-screen-detected CRC – 133 (6.2% of deaths).

**Appendix Table 1.** Data sources and data quality indicators.

| Country/<br>region (year/s<br>of diagnosis) | Data source                                                                                                                                                                                                                   | % Microscopically<br>verified cases <sup>a</sup> | % DCO <sup>a</sup> | Level of<br>completeness<br>(%) <sup>a</sup> | National/<br>regional<br>coverage (%) |
|---------------------------------------------|-------------------------------------------------------------------------------------------------------------------------------------------------------------------------------------------------------------------------------|--------------------------------------------------|--------------------|----------------------------------------------|---------------------------------------|
| <b>Belgium (2009-2016)</b>                  | Belgian Cancer Registry<br><a href="https://kankerregister.org">https://kankerregister.org</a>                                                                                                                                | 96.5 <sup>b</sup>                                | -                  | >95                                          | 100                                   |
| <b>Denmark (2014-2018)</b>                  | Danish Cancer Registry<br><a href="http://www.sundhedsdatastyrelsen.dk">www.sundhedsdatastyrelsen.dk</a> ; Danish Colorectal Cancer Group Database                                                                            | 95                                               | 0.1-0.9            | 97                                           | 100                                   |
| <b>England (2006-2015)</b>                  | National Cancer Registration and Analysis Service, Public Health England<br><a href="https://www.gov.uk/government/organizations/public-health-england">https://www.gov.uk/government/organizations/public-health-england</a> | 83-85                                            | 0.5-4              | >98                                          | 100                                   |
| <b>France</b>                               |                                                                                                                                                                                                                               |                                                  |                    |                                              |                                       |
| Burgundy (2003-2014)                        | Digestive cancer registry of Burgundy                                                                                                                                                                                         | 90-95                                            | -                  | >95                                          | National: 15                          |
| Calvados (2004-2016)                        | Digestive tumours registry of Calvados                                                                                                                                                                                        |                                                  |                    |                                              |                                       |
| Doubs (2008-2016)                           | Cancer registry of Doubs                                                                                                                                                                                                      |                                                  |                    |                                              |                                       |
| Finistere (2004-2016)                       | Digestive tumours registry of Finistere                                                                                                                                                                                       |                                                  |                    |                                              |                                       |
| Isere (2002-2016)                           | Cancer registry of Isere                                                                                                                                                                                                      |                                                  |                    |                                              |                                       |
| <b>Ireland (2012-2016)</b>                  | National Cancer Registry Ireland (NCRI) <a href="https://www.ncri.ie">https://www.ncri.ie</a>                                                                                                                                 | 83.7-92.2                                        | 0.4-3.6            | 97.2 <sup>c</sup>                            | 100                                   |
| <b>Italy</b>                                |                                                                                                                                                                                                                               |                                                  |                    |                                              |                                       |
| Turin (2003-2014)                           | Piedmont Cancer Registry<br><a href="https://www.cpo.it/en/data/cancer-registries/piedmont-cancer-registry/">https://www.cpo.it/en/data/cancer-registries/piedmont-cancer-registry/</a>                                       | 82.5-86.7                                        | 1.8-3.2            | 97.2                                         | Regional: 23                          |
| <b>Netherlands (2015)</b>                   | Netherlands Cancer Registry, Netherlands Comprehensive Cancer Organisation (IKNL)<br><a href="https://www.iknl.nl/en/ncr">https://www.iknl.nl/en/ncr</a>                                                                      | 93                                               | -                  | >95                                          | 100                                   |
| <b>Slovenia (2009-2015)</b>                 | Slovenian Cancer Registry<br><a href="https://www.onko-i.si/eng/crs">https://www.onko-i.si/eng/crs</a> ;<br><a href="http://www.slora.si/en/">http://www.slora.si/en/</a>                                                     | 96.0-97.1                                        | 0.1-0.5            | -                                            | 100                                   |
| <b>Spain</b>                                |                                                                                                                                                                                                                               |                                                  |                    |                                              |                                       |
| Basque country (2009-2015)                  | Basque Cancer Registry<br><a href="https://www.euskadi.eus/informacion/registros-de-cancer/web01-a3regepi/es/">https://www.euskadi.eus/informacion/registros-de-cancer/web01-a3regepi/es/</a>                                 | 87.4-91.1                                        | 0.4-2.8            | -                                            | Regional: 100                         |
| Girona (2013-2016)                          | Girona Cancer Registry<br><a href="http://ico.gencat.cat/ca/professionals/serveis_i_programes/registre_del_cancer/">http://ico.gencat.cat/ca/professionals/serveis_i_programes/registre_del_cancer/</a>                       | 87.1-89.4                                        | 0.5-3.9            | 91.3-94.9                                    | National: 1.6                         |
| Murcia (2006-2012)                          | Murcia Cancer Registry<br><a href="http://www.murciasalud.es">http://www.murciasalud.es</a>                                                                                                                                   | 91.3-93.2                                        | 0.4-1.8            | 92.3-97.9                                    | National: 3.1                         |
| Tarragona (2012-2014)                       | Tarragona Cancer Registry<br><a href="https://epicancer.cat">https://epicancer.cat</a>                                                                                                                                        | 89.8-91.4                                        | 0.3-1.6            | 94.4-98.0                                    | National: 1.7                         |

<sup>a</sup> Lowest and highest annual percentages for years of diagnosis included for each country/region (for all cancers apart from C44). For Belgium, Denmark, France, Italy (Turin), and Spain (Basque Country and Girona), the lowest and highest percentages refer to years of diagnosis 2000 up to the most recent year with available data (unless a different reference year is specified in the footnotes).

<sup>b</sup> For Belgium, the reference year for % of microscopically verified cases was 2017.

<sup>c</sup> For the calendar year 2010 within five years of incidence.

**Appendix Table 2. Data sources and definitions of screen-detected cancers in the included countries/ regions.**

| Country/<br>region        | Data on mode of detection were obtained through linkages with:                                          | Definition of screen-detected cancer:                                                                                                                                                                                   |
|---------------------------|---------------------------------------------------------------------------------------------------------|-------------------------------------------------------------------------------------------------------------------------------------------------------------------------------------------------------------------------|
| <b>Belgium</b>            | - Databases from regional screening organisations and Inter-mutualistic Agency (IMA)                    | Cancer detected within 6 months after colonoscopy following a positive gFOBT/FIT result and before the next recommended screening invitation (24 months) in the context of the organised regional screening programmes. |
| <b>Denmark</b>            | - Danish Colorectal Cancer Group Database<br>- Danish Quality Database for Colon Cancer Screening       | Cancer detected at colonoscopy within 2 months after a positive FIT in the context of the organised screening programme.                                                                                                |
| <b>England</b>            | - NHS National Screening Programme database                                                             | Cancer detected through the organised gFOBT-based programme.                                                                                                                                                            |
| <b>France (5 regions)</b> | - Patient's medical record (general practitioners, endoscopists, gastroenterologists) <sup>b</sup>      | Cancer detected through the organised gFOBT/FIT-based programme or through opportunistic screening. <sup>a</sup>                                                                                                        |
| <b>Ireland</b>            | - Patient's medical record                                                                              | Cancer detected through the organised FIT-based programme or through opportunistic screening.                                                                                                                           |
| <b>Italy (Turin)</b>      | - Regional screening database                                                                           | Cancer detected within 9 months following a positive screening test (FIT or FS) result within the organised screening programme.                                                                                        |
| <b>Netherlands</b>        | - Patient's medical record                                                                              | Cancer detected through the organised FIT-based programme.                                                                                                                                                              |
| <b>Slovenia</b>           | - National organised screening and early detection programme for colorectal cancer – the Svit Programme | Cancer detected through the organised FIT-based programme. <sup>c</sup>                                                                                                                                                 |
| <b>Spain (4 regions)</b>  | - Regional organised screening programme databases                                                      | Cancer detected through the organised FIT-based programme.                                                                                                                                                              |

<sup>a</sup> Databases relying on notifications from laboratories of pathological anatomy (cyto-histopathology registry)

<sup>b</sup> For Finistere, data were obtained from medical records and from the regional screening centre (and checked for consistency). Only patients with cancers detected through the organised programme (within 1 year since a positive FIT) were considered “screen-detected”.

<sup>c</sup> In addition, data from the screening programme were cross checked with medical reports.

FIT, faecal immunochemical test; FS, flexible sigmoidoscopy; gFOBT, guaiac-based faecal occult blood test.

**Appendix Table 3. Characteristics and parameters of organised colorectal cancer screening programmes in the countries/ regions included in the study.**

| Country/region              | Screening test                                       | Year of programme initiation and, if applicable, termination | Age groups (years)                           | Screening interval (years) | Is the faecal test mailed with the invitation letter? | Has the programme been fully rolled out during the study period? If so, when? | Participation rates, i.e., number of people screened/ number of people invited (year of data collection; source) | References                                                                                              |
|-----------------------------|------------------------------------------------------|--------------------------------------------------------------|----------------------------------------------|----------------------------|-------------------------------------------------------|-------------------------------------------------------------------------------|------------------------------------------------------------------------------------------------------------------|---------------------------------------------------------------------------------------------------------|
| Belgium (Wallonia/Brussels) | gFOBT                                                | 2009-2016                                                    | 50-74                                        | 2                          | No <sup>a</sup>                                       | Yes, in 2009                                                                  | 4.5% (2014) <sup>1</sup>                                                                                         | 1-3                                                                                                     |
|                             | FIT                                                  | Since 2016 (March)                                           |                                              | 2                          | Yes                                                   |                                                                               | 7.9% (2016) – this figure refers to both gFOBT and FIT                                                           | 2,3                                                                                                     |
| Belgium (Flanders)          | FIT                                                  | Since 2013 (October)                                         | 56-74 <sup>b</sup>                           | 2                          | Yes                                                   | Yes, in 2015                                                                  | 50.3% (2014); <sup>1</sup> 54.5% (2016) <sup>4</sup>                                                             | 1,2,4-6                                                                                                 |
| Denmark                     | FIT                                                  | Since 2014                                                   | 50-74                                        | 2                          | Yes                                                   | Yes, in 2017                                                                  | 62.6% (2014-2016) <sup>7</sup>                                                                                   | 2,7                                                                                                     |
| England                     | gFOBT                                                | 2006-2009                                                    | 60-69                                        | 2                          | Yes                                                   | Yes, in 2010                                                                  | 55.3% (2013) <sup>1</sup>                                                                                        | 1,2,8                                                                                                   |
|                             |                                                      | Since 2010 <sup>c</sup>                                      | 60-74                                        |                            |                                                       |                                                                               |                                                                                                                  |                                                                                                         |
|                             | Sigmoidoscopy                                        | 2013-2021 <sup>d</sup>                                       | 55                                           | Once only                  | NA                                                    | No                                                                            | 43.1% (2013-2014) <sup>8</sup>                                                                                   |                                                                                                         |
| <b>France</b>               |                                                      |                                                              |                                              |                            |                                                       |                                                                               |                                                                                                                  |                                                                                                         |
| Burgundy                    | gFOBT                                                | 2003-2014                                                    | 50-74                                        | 2                          | No <sup>e</sup>                                       | Yes, in 2003                                                                  | 53.9-54.5% (2009-2010) <sup>9</sup>                                                                              | 9,10                                                                                                    |
|                             | FIT                                                  | Since 2015                                                   | 50-74                                        | 2                          | No <sup>f</sup>                                       |                                                                               |                                                                                                                  | Nationwide: 28.6% (2015-2016) <sup>6</sup>                                                              |
| Calvados                    | gFOBT                                                | 2004-2008                                                    | 50-74                                        | 2                          | No <sup>e</sup>                                       | Yes, in 2004                                                                  | 31.0% (2008-2009) <sup>10</sup>                                                                                  | 10                                                                                                      |
|                             | FIT                                                  | Since 2009                                                   | 50-74                                        | 2                          | No <sup>f</sup>                                       |                                                                               |                                                                                                                  | 30.6% (2009-2010); <sup>9</sup> 22.8% (2012) <sup>1</sup><br>Nationwide: 28.6% (2015-2016) <sup>6</sup> |
| Doubs                       | gFOBT                                                | 2008-2014                                                    | 50-74                                        | 2                          | No <sup>e</sup>                                       | Yes, in 2008                                                                  | 39.9% (2009-2010) <sup>9</sup>                                                                                   | 9                                                                                                       |
|                             | FIT                                                  | Since 2015                                                   | 50-74                                        | 2                          | No <sup>f</sup>                                       |                                                                               |                                                                                                                  | Nationwide: 28.6% (2015-2016) <sup>6</sup>                                                              |
| Finistere                   | gFOBT                                                | 2004-2014                                                    | 50-74                                        | 2                          | No <sup>e</sup>                                       | Yes, in 2004                                                                  | 33.4% (2009-2010) <sup>9</sup>                                                                                   | 9,10                                                                                                    |
|                             | FIT                                                  | Since 2015                                                   | 50-74                                        | 2                          | No <sup>f</sup>                                       |                                                                               |                                                                                                                  | Nationwide: 28.6% (2015-2016) <sup>6</sup>                                                              |
| Isere                       | gFOBT                                                | 2002-2014                                                    | 50-74                                        | 2                          | No <sup>e</sup>                                       | Yes, in 2002                                                                  | 44.9% (2009-2010) <sup>9</sup>                                                                                   | 9,10                                                                                                    |
|                             | FIT                                                  | Since 2015                                                   | 50-74                                        | 2                          | No <sup>f</sup>                                       |                                                                               |                                                                                                                  | Nationwide: 28.6% (2015-2016) <sup>6</sup>                                                              |
| Ireland                     | FIT                                                  | Since 10/2012                                                | 60-69 <sup>g</sup>                           | 2                          | Yes                                                   | Yes, in 2015                                                                  | 43.1% (2012-2013);<br>40.4% (2014); 39.2% (2015) <sup>11</sup>                                                   | 2,11                                                                                                    |
| Italy (Turin)               | Sigmoidoscopy (alternatively FIT for non-responders) | Since 2003                                                   | 58 (58-69)                                   | Once-only (2)              | No                                                    | Yes, in 2003                                                                  | Sigmoidoscopy: 24.5%; Sigmoidoscopy + FIT: 37.3% (2013) <sup>1</sup>                                             | 1,2,12                                                                                                  |
| Netherlands                 | FIT                                                  | Since 2014                                                   | 55-75 <sup>h</sup>                           | 2                          | Yes                                                   | No                                                                            | 71.3% (2014); <sup>1</sup> 72.6% (2015) <sup>13</sup>                                                            | 1,2,13,14                                                                                               |
| Slovenia                    | FIT                                                  | Since 2009                                                   | 50-69 (since 2015 the upper age limit is 74) | 2                          | Yes                                                   | Yes, in 2011                                                                  | 50.5% (2011-2012) <sup>1</sup> ; 59.7% (2015) <sup>15</sup>                                                      | 1,2,15,16                                                                                               |
| <b>Spain</b>                |                                                      |                                                              |                                              |                            |                                                       |                                                                               |                                                                                                                  |                                                                                                         |
| Basque Country              | FIT                                                  | Since 2009                                                   | 50-69                                        | 2                          | Yes                                                   | Yes, in 2014                                                                  | 68.4% (2009-2014) <sup>17</sup>                                                                                  | 17                                                                                                      |
| Girona                      | FIT                                                  | Since 2013                                                   | 50-69                                        | 2                          | Yes                                                   | No                                                                            | 33.0% (2013-2020) <sup>18</sup>                                                                                  | 18                                                                                                      |
| Murcia                      | FIT                                                  | Since 2006                                                   | 50-69                                        | 2                          | Yes                                                   | No                                                                            | 47.1-49.2% (2006-2013) <sup>19</sup>                                                                             | 19                                                                                                      |
| Tarragona                   | FIT                                                  | Since 2012                                                   | 50-69                                        | 2                          | Yes                                                   | No                                                                            | 54.5% (2012-2013) <sup>1</sup>                                                                                   | i                                                                                                       |

<sup>a</sup> From March 2015 on, the test kit was sent together with the invitation letter to individuals who participated in previous rounds.

<sup>b</sup> In October – December 2013, only 66-74-year-olds were invited to FIT screening in Flanders.

<sup>c</sup> In England, FIT replaced gFOBT across all screening hubs in June 2019.

<sup>d</sup> NHS announced in January 2021 that flexible sigmoidoscopy will no longer be offered. People who had been invited and who had not had their appointment yet will be sent a FIT kit from April 2021.

**Notes to Appendix Table 3. Continued.**

<sup>e</sup> Individuals who did not complete the test after invitation and reminder were sent the test by mail.

<sup>f</sup> France has meanwhile decided to send the FIT kit with the first reminder to individuals who participated in previous rounds.

<sup>g</sup> In Ireland, the programme will be expanded to include 55-74-year-olds.

<sup>h</sup> In the Netherlands, in 2015, the target population only included individuals aged 61, 63, 65, 67, 69 and 75 years.

<sup>i</sup> Data not published (provided by contact person at Tarragona Cancer Registry).

FIT, faecal immunochemical test; gFOBT, guaiac-based faecal occult blood test; NA, not applicable.

**Appendix Table 4. Demographic and tumour characteristics of colorectal cancer patients by mode of detection and country.**

| Characteristic                  | Belgium (2009-2016) |                       |                           |         | Denmark (2014-2018) |                       |                           |         |
|---------------------------------|---------------------|-----------------------|---------------------------|---------|---------------------|-----------------------|---------------------------|---------|
|                                 | All cases           | Screen-detected cases | Non-screen-detected cases | p-value | All cases           | Screen-detected cases | Non-screen-detected cases | p-value |
| <b>Total</b>                    | 34 246              | 3866 (11.3%)          | 30 380 (88.7%)            | -       | 13 790              | 4290 (31.1%)          | 9500 (68.9%)              | -       |
| <b>Sex</b>                      |                     |                       |                           |         |                     |                       |                           |         |
| Male                            | 20 831 (60.8%)      | 2538 (65.6%)          | 18 293 (60.2%)            | <0.0001 | 8045 (58.3%)        | 2554 (59.5%)          | 5491 (57.8%)              | 0.056   |
| Female                          | 13 415 (39.2%)      | 1328 (34.4%)          | 12 087 (39.8%)            |         | 5745 (41.7%)        | 1736 (40.5%)          | 4009 (42.2%)              |         |
| <b>Age at diagnosis (years)</b> |                     |                       |                           |         |                     |                       |                           |         |
| 50-54                           | 2968 (8.7%)         | 36 (0.9%)             | 2932 (9.7%)               | <0.0001 | 1051 (7.6%)         | 332 (7.7%)            | 719 (7.6%)                | 0.056   |
| 55-59                           | 5005 (14.6%)        | 487 (12.6%)           | 4518 (14.9%)              |         | 1610 (11.7%)        | 457 (10.7%)           | 1153 (12.1%)              |         |
| 60-64                           | 7526 (22.0%)        | 935 (24.2%)           | 6591 (21.7%)              |         | 2547 (18.5%)        | 836 (19.5%)           | 1711 (18.0%)              |         |
| 65-69                           | 9071 (26.5%)        | 1097 (28.4%)          | 7974 (26.2%)              |         | 3873 (28.1%)        | 1199 (27.9%)          | 2674 (28.1%)              |         |
| 70-74                           | 9676 (28.3%)        | 1311 (33.9%)          | 8365 (27.5%)              |         | 4709 (34.1%)        | 1466 (34.2%)          | 3243 (34.1%)              |         |
| <b>Tumour location</b>          |                     |                       |                           |         |                     |                       |                           |         |
| Proximal colon                  | 9144 (26.7%)        | 827 (9.0%)            | 8317 (27.4%)              | <0.0001 | 3709 (26.9%)        | 1044 (24.3%)          | 2660 (28.0%)              | <0.0001 |
| Distal colon                    | 12 821 (37.4%)      | 1963 (50.8%)          | 10 858 (35.7%)            |         | 4928 (35.7%)        | 1878 (43.8%)          | 3050 (32.1%)              |         |
| Rectum                          | 11 597 (33.9%)      | 1043 (27.0%)          | 10 554 (34.7%)            |         | 4881 (35.4%)        | 1325 (30.9%)          | 3556 (37.4%)              |         |
| Overlapping or unspecified      | 684 (2.0%)          | 33 (0.9%)             | 651 (2.1%)                |         | 277 (2.0%)          | 43 (1.0%)             | 234 (2.5%)                |         |
| <b>Stage at diagnosis</b>       |                     |                       |                           |         |                     |                       |                           |         |
| I                               | 8480 (26.3%)        | 1913 (51.3%)          | 6567 (23.0%)              | <0.0001 | 2622 (23.5%)        | 1286 (37.9%)          | 1336 (17.2%)              | <0.0001 |
| II                              | 8350 (25.9%)        | 734 (19.7%)           | 7616 (26.7%)              |         | 2967 (26.6%)        | 893 (26.3%)           | 2074 (26.7%)              |         |
| III                             | 8668 (26.8%)        | 836 (22.4%)           | 7832 (27.5%)              |         | 2938 (26.3%)        | 894 (26.4%)           | 2044 (26.3%)              |         |
| IV                              | 6735 (20.9%)        | 247 (6.6%)            | 6488 (22.8%)              |         | 2640 (23.6%)        | 319 (9.4%)            | 2321 (29.9%)              |         |

*(Appendix Table 4 continues on next page)*

Appendix Table 4. Continued.

| Characteristic                  | England (2006-2015)         |                           |                             |         | France, 5 regions (2002-2016) <sup>c</sup> |                       |                           |         |
|---------------------------------|-----------------------------|---------------------------|-----------------------------|---------|--------------------------------------------|-----------------------|---------------------------|---------|
|                                 | All cases                   | Screen-detected cases     | Non-screen-detected cases   | p-value | All cases                                  | Screen-detected cases | Non-screen-detected cases | p-value |
| <b>Total</b>                    | 131 488                     | 23 183 (17.6%)            | 108 305 (82.4%)             | -       | 18 187                                     | 3477 (19.1%)          | 14 710 (80.9%)            | -       |
| <b>Sex</b>                      |                             |                           |                             |         |                                            |                       |                           |         |
| Male                            | 80 240 (61.0%)              | 15 360 (66.3%)            | 64 880 (59.9%)              | <0.0001 | 11 287 (62.1%)                             | 2188 (62.9%)          | 9099 (61.9%)              | 0.24    |
| Female                          | 51 248 (39.0%)              | 7823 (33.7%)              | 43 425 (40.1%)              |         | 6900 (37.9%)                               | 1289 (37.1%)          | 5611 (38.1%)              |         |
| <b>Age at diagnosis (years)</b> |                             |                           |                             |         |                                            |                       |                           |         |
| 50-54                           | -                           | -                         | -                           | -       | 1758 (9.7%)                                | 299 (8.6%)            | 1459 (9.9%)               | 0.0007  |
| 55-59                           | -                           | -                         | -                           | -       | 2908 (16.0%)                               | 497 (14.3%)           | 2411 (16.4%)              |         |
| 60-64                           | 36 686 (44.8%)              | 8081 (46.8%)              | 28 605 (44.3%)              | <0.0001 | 3777 (20.8%)                               | 726 (20.9%)           | 3051 (20.7%)              |         |
| 65-69                           | 45 118 (55.1%)              | 9176 (53.2%)              | 35 942 (55.7%)              |         | 4579 (25.2%)                               | 937 (26.9%)           | 3642 (24.8%)              |         |
| 70-74                           | 49 684 <sup>a</sup>         | 5926 <sup>a</sup>         | 43 758 <sup>a</sup>         |         | - <sup>a</sup>                             | 5165 (28.4%)          | 1018 (29.3%)              |         |
| <b>Tumour location</b>          |                             |                           |                             |         |                                            |                       |                           |         |
| Proximal colon                  | 39 055 (29.7%)              | 5368 (23.2%)              | 33 687 (31.1%)              | <0.0001 | 5348 (29.4%)                               | 982 (28.2%)           | 4366 (29.7%)              | <0.0001 |
| Distal colon                    | 37 890 (28.8%)              | 9106 (39.3%)              | 28 784 (26.6%)              |         | 5685 (31.3%)                               | 1307 (37.6%)          | 4378 (29.8%)              |         |
| Rectum                          | 48 647 (37.0%)              | 8350 (36.0%)              | 40 297 (37.2%)              |         | 6948 (38.2%)                               | 1169 (33.6%)          | 5779 (39.3%)              |         |
| Overlapping or unspecified      | 5896 (4.5%)                 | 359 (1.5%)                | 5537 (5.1%)                 |         | 206 (1.1%)                                 | 19 (0.6%)             | 187 (1.3%)                |         |
| <b>Stage at diagnosis</b>       |                             |                           |                             |         |                                            |                       |                           |         |
| I                               | 10 094 (20.9%) <sup>b</sup> | 4236 (36.6%) <sup>b</sup> | 5858 (16.0%) <sup>b</sup>   | <0.0001 | 4523 (25.7%)                               | 1509 (44.1%)          | 3014 (21.3%)              | <0.0001 |
| II                              | 12 206 (25.3%) <sup>b</sup> | 2999 (25.9%) <sup>b</sup> | 9207 (25.1%) <sup>b</sup>   |         | 4249 (24.2%)                               | 812 (23.7%)           | 3437 (24.3%)              |         |
| III                             | 14 475 (30.0%) <sup>b</sup> | 3417 (29.5%) <sup>b</sup> | 11 058 (30.2%) <sup>b</sup> |         | 4133 (23.5%)                               | 773 (22.6%)           | 3360 (23.7%)              |         |
| IV                              | 11 466 (23.8%) <sup>b</sup> | 921 (8.0%) <sup>b</sup>   | 10 545 (28.8%) <sup>b</sup> |         | 4664 (26.5%)                               | 325 (9.5%)            | 4339 (30.7%)              |         |

(Appendix Table 4 continues on next page)



Appendix Table 4. Continued.

| Characteristic                  | Ireland (2012-2016) |                       |                           |         | Italy, Turin (2003-2014)  |                          |                           |         |
|---------------------------------|---------------------|-----------------------|---------------------------|---------|---------------------------|--------------------------|---------------------------|---------|
|                                 | All cases           | Screen-detected cases | Non-screen-detected cases | p-value | All cases                 | Screen-detected cases    | Non-screen-detected cases | p-value |
| <b>Total</b>                    | 3571                | 610 (17.1%)           | 2961 (82.9%)              | -       | 2433                      | 359 (14.8%)              | 2074 (85.2%)              | -       |
| <b>Sex</b>                      |                     |                       |                           |         |                           |                          |                           |         |
| Male                            | 2249 (63.0%)        | 399 (65.4%)           | 1850 (62.5%)              | 0.17    | 1384 (56.9%)              | 217 (60.4%)              | 1167 (56.3%)              | 0.14    |
| Female                          | 1322 (37.0%)        | 211 (34.6%)           | 1111 (37.5%)              |         | 1049 (43.1%)              | 142 (39.6%)              | 907 (43.7%)               |         |
| <b>Age at diagnosis (years)</b> |                     |                       |                           |         |                           |                          |                           |         |
| 50-54                           | -                   | -                     | -                         | -       | -                         | -                        | -                         | 0.034   |
| 55-59                           | -                   | -                     | -                         | -       | -                         | -                        | -                         |         |
| 60-64                           | 1579 (44.2%)        | 237 (38.9%)           | 1342 (45.3%)              | 0.0034  | 1189 (48.9%) <sup>d</sup> | 194 (54.0%) <sup>d</sup> | 995 (48.0%) <sup>d</sup>  |         |
| 65-69                           | 1992 (55.8%)        | 373 (61.1%)           | 1619 (54.7%)              |         | 1244 (51.1%)              | 165 (46.0%)              | 1079 (52.0%)              |         |
| 70-74                           | -                   | -                     | -                         |         | -                         | -                        | -                         |         |
| <b>Tumour location</b>          |                     |                       |                           |         |                           |                          |                           |         |
| Proximal colon                  | 1071 (30.0%)        | 163 (26.7%)           | 908 (30.7%)               | <0.0001 | 664 (27.3%)               | 82 (22.8%)               | 582 (28.1%)               | 0.034   |
| Distal colon                    | 1065 (29.8%)        | 249 (40.8%)           | 816 (27.6%)               |         | 770 (31.6%)               | 134 (37.3%)              | 636 (30.7%)               |         |
| Rectum                          | 1317 (36.9%)        | 185 (30.3%)           | 1132 (38.2%)              |         | 642 (26.4%)               | 86 (24.0%)               | 556 (26.8%)               |         |
| Overlapping or unspecified      | 118 (3.3%)          | 13 (2.1%)             | 105 (3.5%)                |         | 357 (14.7%)               | 57 (15.9%)               | 300 (14.5%)               |         |
| <b>Stage at diagnosis</b>       |                     |                       |                           |         |                           |                          |                           |         |
| I                               | 488 (17.1%)         | 174 (35.7%)           | 314 (13.2%)               | <0.0001 | -                         | -                        | -                         | -       |
| II                              | 638 (22.3%)         | 117 (24.0%)           | 521 (22.0%)               |         | -                         | -                        | -                         |         |
| III                             | 1022 (35.8%)        | 155 (31.8%)           | 867 (36.6%)               |         | -                         | -                        | -                         |         |
| IV                              | 709 (24.8%)         | 41 (8.4%)             | 668 (28.2%)               |         | -                         | -                        | -                         |         |

(Appendix Table 4 continues on next page)

Appendix Table 4. Continued.

| Characteristic                  | Netherlands (2015)        |                          |                           |         | Slovenia (2009-2015) |                       |                           |         |
|---------------------------------|---------------------------|--------------------------|---------------------------|---------|----------------------|-----------------------|---------------------------|---------|
|                                 | All cases                 | Screen-detected cases    | Non-screen-detected cases | p-value | All cases            | Screen-detected cases | Non-screen-detected cases | p-value |
| <b>Total</b>                    | 9461                      | 3848 (40.7%)             | 5613 (59.3%)              | -       | 4620                 | 1792 (38.8%)          | 2828 (61.2%)              | -       |
| <b>Sex</b>                      |                           |                          |                           |         |                      |                       |                           |         |
| Male                            | 5748 (60.8%)              | 2390 (62.1%)             | 3358 (59.8%)              | 0.025   | 3029 (65.6%)         | 1138 (63.5%)          | 1891 (66.9%)              | 0.019   |
| Female                          | 3713 (39.2%)              | 1458 (37.9%)             | 2255 (40.2%)              |         | 1591 (34.4%)         | 654 (36.5%)           | 937 (33.1%)               |         |
| <b>Age at diagnosis (years)</b> |                           |                          |                           |         |                      |                       |                           |         |
| 50-54                           | -                         | -                        | -                         | -       | 716 (15.5%)          | 330 (18.4%)           | 386 (13.7%)               | <0.0001 |
| 55-59                           | -                         | -                        | -                         | -       | 1005 (21.8%)         | 362 (20.2%)           | 643 (22.7%)               |         |
| 60-64                           | 2449 (25.9%)              | 1163 (30.2%)             | 1286 (22.9%)              | <0.0001 | 1397 (30.2%)         | 579 (32.3%)           | 818 (28.9%)               |         |
| 65-69                           | 3888 (41.1%)              | 2155 (56.0%)             | 1733 (30.9%)              |         | 1502 (32.5%)         | 521 (29.1%)           | 981 (34.7%)               |         |
| 70-74                           | 3124 (33.0%) <sup>e</sup> | 530 (13.8%) <sup>e</sup> | 2594 (46.2%) <sup>e</sup> |         | -                    | -                     | -                         |         |
| <b>Tumour location</b>          |                           |                          |                           |         |                      |                       |                           |         |
| Proximal colon                  | 2737 (28.9%)              | 894 (23.2%)              | 1843 (32.8%)              | <0.0001 | 1086 (23.5%)         | 349 (19.5%)           | 737 (26.1%)               | <0.0001 |
| Distal colon                    | 3685 (38.9%)              | 1829 (47.5%)             | 1856 (33.1%)              |         | 1541 (33.4%)         | 720 (40.2%)           | 821 (29.0%)               |         |
| Rectum                          | 2894 (30.6%)              | 1082 (28.1%)             | 1812 (32.3%)              |         | 1970 (42.6%)         | 719 (40.1%)           | 1251 (44.2%)              |         |
| Overlapping or unspecified      | 145 (1.5%)                | 43 (1.1%)                | 102 (1.8%)                |         | 23 (0.5%)            | 4 (0.2%)              | 19 (0.7%)                 |         |
| <b>Stage at diagnosis</b>       |                           |                          |                           |         |                      |                       |                           |         |
| I                               | 2969 (31.8%)              | 1884 (49.7%)             | 1085 (19.6%)              | <0.0001 | 1298 (29.6%)         | 825 (48.5%)           | 473 (17.6%)               | <0.0001 |
| II                              | 2074 (22.2%)              | 738 (19.5%)              | 1336 (24.2%)              |         | 1098 (25.0%)         | 351 (20.6%)           | 747 (27.8%)               |         |
| III                             | 2683 (28.8%)              | 950 (25.0%)              | 1733 (31.3%)              |         | 1105 (25.2%)         | 394 (23.2%)           | 711 (26.5%)               |         |
| IV                              | 1598 (17.1%)              | 221 (5.8%)               | 1377 (24.9%)              |         | 886 (20.2%)          | 130 (7.6%)            | 756 (28.1%)               |         |

(Appendix Table 4 continues on next page)

**Appendix Table 4. Continued.**

| Characteristic                  | Spain, 4 regions (2006-2016) <sup>f</sup> |                           |                           | p-value |
|---------------------------------|-------------------------------------------|---------------------------|---------------------------|---------|
|                                 | All cases                                 | Screen-detected cases     | Non-screen-detected cases |         |
| <b>Total</b>                    | 10 338                                    | 2867 (27.7%)              | 7471 (72.3%)              | -       |
| <b>Sex</b>                      |                                           |                           |                           |         |
| Male                            | 6689 (64.7%)                              | 1893 (66.0%)              | 4796 (64.2%)              | 0.081   |
| Female                          | 3649 (35.3%)                              | 974 (34.0%)               | 2675 (35.8%)              |         |
| <b>Age at diagnosis (years)</b> |                                           |                           |                           |         |
| 50-54                           | 1566 (15.1%)                              | 444 (15.5%)               | 1122 (15.0%)              | 0.43    |
| 55-59                           | 2272 (22.0%)                              | 654 (22.8%)               | 1618 (21.7%)              |         |
| 60-64                           | 2931 (28.4%)                              | 787 (27.5%)               | 2144 (28.7%)              |         |
| 65-69                           | 3569 (34.5%)                              | 982 (34.3%)               | 2587 (34.6%)              |         |
| 70-74                           | -                                         | -                         | -                         |         |
| <b>Tumour location</b>          |                                           |                           |                           |         |
| Proximal colon                  | 2420 (23.4%)                              | 562 (19.6%)               | 1858 (24.9%)              | <0.0001 |
| Distal colon                    | 3864 (37.4%)                              | 1350 (47.1%)              | 2514 (33.7%)              |         |
| Rectum                          | 3488 (33.7%)                              | 869 (30.3%)               | 2619 (35.1%)              |         |
| Overlapping or unspecified      | 566 (5.5%)                                | 86 (3.0%)                 | 480 (6.4%)                |         |
|                                 |                                           |                           |                           |         |
| <b>Stage at diagnosis</b>       |                                           |                           |                           |         |
| I                               | 2487 (28.9%) <sup>g</sup>                 | 1356 (50.9%) <sup>g</sup> | 1131 (19.1%) <sup>g</sup> | <0.0001 |
| II                              | 1948 (22.7%) <sup>g</sup>                 | 480 (18.0%) <sup>g</sup>  | 1468 (24.7%) <sup>g</sup> |         |
| III                             | 2546 (29.6%) <sup>g</sup>                 | 645 (24.2%) <sup>g</sup>  | 1901 (32.0%) <sup>g</sup> |         |
| IV                              | 1613 (18.8%) <sup>g</sup>                 | 181 (6.8%) <sup>g</sup>   | 1432 (24.1%) <sup>g</sup> |         |

<sup>a</sup> In England, screening was extended to the age group 70-74 years in 2010 only. Therefore, this age group was excluded from the statistical analysis (Chi square test).

<sup>b</sup> For England, data on stage were only available from 2012 onwards. Therefore, patients diagnosed in 2009-2011 were not included in analyses of stage.

<sup>c</sup> The specific years for which data were included for each French region are provided in Table 1.

<sup>d</sup> Age group 58-64 years.

<sup>e</sup> Age group 70-75 years.

<sup>f</sup> The specific years for which data were included for each Spanish region are provided in Table 1.

<sup>g</sup> For analyses of stage, patients diagnosed in the Basque country in 2009 (> 85% with unknown stage) were not included.

**Appendix Table 5. Last follow-up dates, median follow-up time and interquartile range by country/region.**

| Country/region (year/s of diagnosis) | Last follow-up date | Median follow-up time in years (interquartile range)                                                                                                                                                                                                                                                                                                                                                                                                                                             |                                                                                                                                                                                                                                                                                                                                                                                                                                                                                                  |
|--------------------------------------|---------------------|--------------------------------------------------------------------------------------------------------------------------------------------------------------------------------------------------------------------------------------------------------------------------------------------------------------------------------------------------------------------------------------------------------------------------------------------------------------------------------------------------|--------------------------------------------------------------------------------------------------------------------------------------------------------------------------------------------------------------------------------------------------------------------------------------------------------------------------------------------------------------------------------------------------------------------------------------------------------------------------------------------------|
|                                      |                     | Overall survival                                                                                                                                                                                                                                                                                                                                                                                                                                                                                 | CRC-specific survival                                                                                                                                                                                                                                                                                                                                                                                                                                                                            |
| All included countries <sup>a</sup>  | -                   | <b>All cases</b><br>Total: 4.1 (2.0-7.2)<br>Stage I: 4.1 (2.8-5.9)<br>Stage II: 4.3 (2.9-6.0)<br>Stage III: 3.8 (2.4-5.6)<br>Stage IV: 1.4 (0.5-2.8)<br><b>Screen-detected cases</b><br>Total: 4.5 (2.8-7.4)<br>Stage I: 3.7 (2.6-5.5)<br>Stage II: 4.0 (2.8-5.5)<br>Stage III: 3.7 (2.5-5.3)<br>Stage IV: 2.3 (1.2-3.6)<br><b>Non-screen-detected cases</b><br>Total: 3.9 (1.6-7.1)<br>Stage I: 4.5 (3.1-6.2)<br>Stage II: 4.5 (2.9-6.1)<br>Stage III: 3.9 (2.4-5.7)<br>Stage IV: 1.3 (0.4-2.7) | <b>All cases</b><br>Total: 4.7 (2.0-7.8)<br>Stage I: 4.7 (3.6-5.9)<br>Stage II: 4.6 (3.5-5.8)<br>Stage III: 4.2 (3.0-5.5)<br>Stage IV: 1.1 (0.3-2.6)<br><b>Screen-detected cases</b><br>Total: 5.7 (3.8-8.0)<br>Stage I: 4.7 (3.6-5.9)<br>Stage II: 4.7 (3.6-5.9)<br>Stage III: 4.4 (3.4-5.7)<br>Stage IV: 2.6 (1.3-4.3)<br><b>Non-screen-detected cases</b><br>Total: 4.2 (1.5-7.7)<br>Stage I: 4.6 (3.6-5.9)<br>Stage II: 4.5 (3.4-5.8)<br>Stage III: 4.0 (2.7-5.4)<br>Stage IV: 1.0 (0.3-2.4) |
| Belgium (2009-2016)                  | July 2018           | <b>All cases</b><br>Total: 3.8 (2.1-6.0)<br>Stage I: 4.2 (2.8-6.3)<br>Stage II: 4.6 (2.8-6.8)<br>Stage III: 4.1 (2.4-6.3)<br>Stage IV: 1.8 (0.8-3.3)<br><b>Screen-detected cases</b><br>Total: 3.3 (2.4-4.1)<br>Stage I: 3.4 (2.5-4.1)<br>Stage II: 3.4 (2.3-4.2)<br>Stage III: 3.3 (2.4-4.1)<br>Stage IV: 2.3 (1.6-3.4)<br><b>Non-screen-detected cases</b><br>Total: 3.9 (2.0-6.3)<br>Stage I: 4.8 (3.1-6.9)<br>Stage II: 4.9 (2.9-7.0)<br>Stage III: 4.3 (2.4-6.5)<br>Stage IV: 1.8 (0.8-3.3) | Not applicable                                                                                                                                                                                                                                                                                                                                                                                                                                                                                   |
| Denmark (2014-2018)                  | December 2018       | <b>All cases</b><br>Total: 2.1 (1.0-3.5)<br>Stage I: 2.3 (1.2-3.6)<br>Stage II: 2.6 (1.4-3.8)<br>Stage III: 2.3 (1.2-3.6)<br>Stage IV: 1.1 (0.4-2.1)<br><b>Screen-detected cases</b><br>Total: 2.1 (1.2-3.2)<br>Stage I: 2.1 (1.2-3.2)<br>Stage II: 2.1 (1.2-3.4)<br>Stage III: 2.1 (1.2-3.2)<br>Stage IV: 1.5 (0.9-2.6)<br><b>Non-screen-detected cases</b><br>Total: 2.1 (0.9-3.6)<br>Stage I: 2.7 (1.2-3.9)<br>Stage II: 2.8 (1.5-4.0)<br>Stage III: 2.4 (1.2-3.7)<br>Stage IV: 1.0 (0.4-2.0) | Not applicable                                                                                                                                                                                                                                                                                                                                                                                                                                                                                   |
| England (2006-2015)                  | December 2018       | <b>All cases</b><br>Total: 4.6 (1.6-7.9)<br>Stage I: 4.8 (3.8-5.9)<br>Stage II: 4.6 (3.5-5.8)<br>Stage III: 4.2 (3.1-5.5)<br>Stage IV: 1.0 (0.3-2.3)<br><b>Screen-detected cases</b><br>Total: 5.9 (4.0-8.0)<br>Stage I: 4.9 (3.9-6.0)<br>Stage II: 4.8 (3.8-5.9)<br>Stage III: 4.5 (3.5-5.7)<br>Stage IV: 2.4 (1.2-4.3)<br><b>Non-screen-detected cases</b><br>Total: 4.2 (1.2-7.9)<br>Stage I: 4.7 (3.7-5.9)<br>Stage II: 4.5 (3.4-5.8)<br>Stage III: 4.0 (2.6-5.4)<br>Stage IV: 0.9 (0.2-2.2) | <b>All cases</b><br>Total: 4.6 (1.6-7.9)<br>Stage I: 4.8 (3.8-5.9)<br>Stage II: 4.6 (3.5-5.8)<br>Stage III: 4.2 (3.0-5.5)<br>Stage IV: 1.0 (0.2-2.3)<br><b>Screen-detected cases</b><br>Total: 5.9 (4.0-8.0)<br>Stage I: 4.9 (3.9-6.0)<br>Stage II: 4.8 (3.8-5.9)<br>Stage III: 4.5 (3.5-5.7)<br>Stage IV: 2.4 (1.2-4.3)<br><b>Non-screen-detected cases</b><br>Total: 4.2 (1.2-7.9)<br>Stage I: 4.7 (3.7-5.9)<br>Stage II: 4.5 (3.4-5.8)<br>Stage III: 4.0 (2.5-5.4)<br>Stage IV: 0.9 (0.2-2.1) |

(Appendix Table 5 continues on next page)

Appendix Table 5. Continued.

| Country/region (year/s of diagnosis) | Last follow-up date                                              | Median follow-up time in years (interquartile range)                                                                                                                                                                                                                                                                                                                                                                                                                                                |                                                                                                                                                                                                                                                                                                                                                                                                                                                                                                  |
|--------------------------------------|------------------------------------------------------------------|-----------------------------------------------------------------------------------------------------------------------------------------------------------------------------------------------------------------------------------------------------------------------------------------------------------------------------------------------------------------------------------------------------------------------------------------------------------------------------------------------------|--------------------------------------------------------------------------------------------------------------------------------------------------------------------------------------------------------------------------------------------------------------------------------------------------------------------------------------------------------------------------------------------------------------------------------------------------------------------------------------------------|
|                                      |                                                                  | Overall survival                                                                                                                                                                                                                                                                                                                                                                                                                                                                                    | CRC-specific survival                                                                                                                                                                                                                                                                                                                                                                                                                                                                            |
| <b>France, 5 regions</b>             | -                                                                |                                                                                                                                                                                                                                                                                                                                                                                                                                                                                                     | Not applicable                                                                                                                                                                                                                                                                                                                                                                                                                                                                                   |
| Burgundy (2003-2016)                 | March 2019                                                       | <b>All cases</b><br>Total: 4.4 (1.9-8.4)<br>Stage I: 6.5 (3.5-10.0)<br>Stage II: 6.2 (3.4-9.8)<br>Stage III: 5.3 (2.8-9.1)<br>Stage IV: 1.6 (0.6-3.0)<br><b>Screen-detected cases</b><br>Total: 6.5 (3.0-9.8)<br>Stage I: 7.1 (3.7-10.4)<br>Stage II: 7.2 (4.0-10.3)<br>Stage III: 6.3 (3.4-9.6)<br>Stage IV: 2.4 (1.4-4.0)<br><b>Non-screen-detected cases</b><br>Total: 3.9 (1.7-7.8)<br>Stage I: 6.2 (3.4-9.8)<br>Stage II: 5.9 (3.2-9.6)<br>Stage III: 5.1 (2.7-8.8)<br>Stage IV: 1.5 (0.6-2.9) |                                                                                                                                                                                                                                                                                                                                                                                                                                                                                                  |
| Calvados (2004-2016)                 | March 2019                                                       |                                                                                                                                                                                                                                                                                                                                                                                                                                                                                                     |                                                                                                                                                                                                                                                                                                                                                                                                                                                                                                  |
| Doubs (2008-2016)                    | March 2019                                                       |                                                                                                                                                                                                                                                                                                                                                                                                                                                                                                     |                                                                                                                                                                                                                                                                                                                                                                                                                                                                                                  |
| Finistere (2004-2016)                | April 2019                                                       |                                                                                                                                                                                                                                                                                                                                                                                                                                                                                                     |                                                                                                                                                                                                                                                                                                                                                                                                                                                                                                  |
| Isere (2002-2016)                    | April 2019                                                       |                                                                                                                                                                                                                                                                                                                                                                                                                                                                                                     |                                                                                                                                                                                                                                                                                                                                                                                                                                                                                                  |
| <b>Ireland (2012-2016)</b>           | December 2018                                                    | <b>All cases</b><br>Total: 3.4 (2.2-4.9)<br>Stage I: 3.7 (2.8-5.0)<br>Stage II: 3.9 (2.8-5.4)<br>Stage III: 3.7 (2.6-5.0)<br>Stage IV: 1.3 (0.4-2.6)<br><b>Screen-detected cases</b><br>Total: 3.3 (2.5-4.2)<br>Stage I: 3.2 (2.5-4.0)<br>Stage II: 3.2 (2.6-4.2)<br>Stage III: 3.2 (2.5-4.0)<br>Stage IV: 2.4 (1.6-3.4)<br><b>Non-screen-detected cases</b><br>Total: 3.4 (2.1-5.1)<br>Stage I: 4.2 (2.9-5.5)<br>Stage II: 4.1 (2.9-5.6)<br>Stage III: 3.8 (2.6-5.2)<br>Stage IV: 1.2 (0.4-2.5)    | <b>All cases</b><br>Total: 3.4 (2.2-4.9)<br>Stage I: 3.7 (2.8-5.0)<br>Stage II: 3.9 (2.8-5.4)<br>Stage III: 3.7 (2.6-5.0)<br>Stage IV: 1.3 (0.4-2.6)<br><b>Screen-detected cases</b><br>Total: 3.3 (2.5-4.2)<br>Stage I: 3.2 (2.5-4.0)<br>Stage II: 3.2 (2.6-4.2)<br>Stage III: 3.2 (2.5-4.0)<br>Stage IV: 2.4 (1.6-3.4)<br><b>Non-screen-detected cases</b><br>Total: 3.4 (2.1-5.1)<br>Stage I: 4.2 (2.9-5.5)<br>Stage II: 4.1 (2.9-5.6)<br>Stage III: 3.8 (2.6-5.2)<br>Stage IV: 1.2 (0.4-2.5) |
| <b>Italy, Turin (2003-2014)</b>      | December 2016<br>(December 2015 with cause of death information) | <b>All cases</b><br>Total: 5.3 (2.1-9.1)<br><b>Screen-detected cases</b><br>Total: 7.4 (4.7-9.9)<br><b>Non-screen-detected cases</b><br>Total: 4.8 (1.9-8.9)                                                                                                                                                                                                                                                                                                                                        | <b>All cases</b><br>Total: 4.9 (2.0-8.6)<br><b>Screen-detected cases</b><br>Total: 6.5 (3.9-9.1)<br><b>Non-screen-detected cases</b><br>Total: 4.4 (1.8-8.5)                                                                                                                                                                                                                                                                                                                                     |
| <b>Netherlands (2015)</b>            | February 2018                                                    | <b>All cases</b><br>Total: 2.4 (2.2-2.8)<br>Stage I: 2.5 (2.3-2.8)<br>Stage II: 2.5 (2.3-2.8)<br>Stage III: 2.5 (2.2-2.8)<br>Stage IV: 1.3 (0.4-2.3)<br><b>Screen-detected cases</b><br>Total: 2.5 (2.3-2.8)<br>Stage I: 2.5 (2.3-2.8)<br>Stage II: 2.6 (2.3-2.8)<br>Stage III: 2.5 (2.2-2.8)<br>Stage IV: 2.2 (1.3-2.6)<br><b>Non-screen-detected cases</b><br>Total: 2.4 (1.9-2.7)<br>Stage I: 2.6 (2.3-2.8)<br>Stage II: 2.5 (2.2-2.8)<br>Stage III: 2.5 (2.2-2.8)<br>Stage IV: 1.2 (0.4-2.2)    | Not applicable                                                                                                                                                                                                                                                                                                                                                                                                                                                                                   |

(Appendix Table 5 continues on next page)

Appendix Table 5. Continued.

| Country/region (year/s of diagnosis) | Last follow-up date                                              | Median follow-up time in years (interquartile range)                                                                                                                                                                                                                                                                                                                                                                                                                                             |                                                                                                                                                                                                                                                                                                                                                                                                                                                                                                  |
|--------------------------------------|------------------------------------------------------------------|--------------------------------------------------------------------------------------------------------------------------------------------------------------------------------------------------------------------------------------------------------------------------------------------------------------------------------------------------------------------------------------------------------------------------------------------------------------------------------------------------|--------------------------------------------------------------------------------------------------------------------------------------------------------------------------------------------------------------------------------------------------------------------------------------------------------------------------------------------------------------------------------------------------------------------------------------------------------------------------------------------------|
|                                      |                                                                  | Overall survival                                                                                                                                                                                                                                                                                                                                                                                                                                                                                 | CRC-specific survival                                                                                                                                                                                                                                                                                                                                                                                                                                                                            |
| <b>Slovenia (2009-2015)</b>          | February 2019<br>(December 2017 with cause of death information) | <b>All cases</b><br>Total: 5.2 (2.6-7.7)<br>Stage I: 6.7 (4.6-8.2)<br>Stage II: 6.2 (4.2-8.3)<br>Stage III: 5.2 (3.2-7.7)<br>Stage IV: 1.3 (0.4-2.9)<br><b>Screen-detected cases</b><br>Total: 6.2 (4.2-7.8)<br>Stage I: 6.5 (4.6-7.9)<br>Stage II: 6.1 (4.7-7.9)<br>Stage III: 6.2 (3.9-7.8)<br>Stage IV: 2.4 (1.2-4.3)<br><b>Non-screen-detected cases</b><br>Total: 4.2 (1.4-7.6)<br>Stage I: 7.0 (4.6-8.9)<br>Stage II: 6.3 (3.9-8.7)<br>Stage III: 4.6 (2.5-7.6)<br>Stage IV: 1.2 (0.3-2.7) | <b>All cases</b><br>Total: 4.4 (2.3-6.7)<br>Stage I: 6.7 (4.6-8.2)<br>Stage II: 6.2 (4.2-8.3)<br>Stage III: 5.2 (3.2-7.8)<br>Stage IV: 1.3 (0.4-2.9)<br><b>Screen-detected cases</b><br>Total: 5.1 (3.3-6.8)<br>Stage I: 5.5 (3.7-6.9)<br>Stage II: 5.1 (3.9-6.8)<br>Stage III: 5.2 (3.3-6.8)<br>Stage IV: 2.2 (1.2-4.0)<br><b>Non-screen-detected cases</b><br>Total: 3.6 (1.4-6.6)<br>Stage I: 7.0 (4.5-8.9)<br>Stage II: 6.3 (3.9-8.7)<br>Stage III: 4.7 (2.5-7.6)<br>Stage IV: 1.2 (0.3-2.7) |
| <b>Spain, 4 regions</b>              | -                                                                | <b>All cases</b><br>Total: 3.8 (2.3-5.7)                                                                                                                                                                                                                                                                                                                                                                                                                                                         | <b>All cases</b><br>Total: 3.5 (2.3-5.1)                                                                                                                                                                                                                                                                                                                                                                                                                                                         |
| Basque Country (2009-2015)           | June 2019                                                        | Stage I: 4.2 (2.9-5.8)                                                                                                                                                                                                                                                                                                                                                                                                                                                                           | Stage I: 3.7 (2.8-5.0)                                                                                                                                                                                                                                                                                                                                                                                                                                                                           |
| Girona (2013-2016)                   | December 2018                                                    | Stage II: 4.5 (2.9-5.9)                                                                                                                                                                                                                                                                                                                                                                                                                                                                          | Stage II: 3.9 (2.7-5.1)                                                                                                                                                                                                                                                                                                                                                                                                                                                                          |
| Murcia (2006-2012)                   | January 2020                                                     | Stage III: 3.9 (2.6-5.6)                                                                                                                                                                                                                                                                                                                                                                                                                                                                         | Stage III: 3.6 (2.6-4.9)                                                                                                                                                                                                                                                                                                                                                                                                                                                                         |
| Tarragona (2012-2014)                | December 2016                                                    | Stage IV: 1.6 (0.6-3.2)                                                                                                                                                                                                                                                                                                                                                                                                                                                                          | Stage IV: 1.6 (0.6-3.1)                                                                                                                                                                                                                                                                                                                                                                                                                                                                          |
|                                      |                                                                  | <b>Screen-detected cases</b><br>Total: 3.6 (2.6-5.1)<br>Stage I: 3.7 (2.8-5.2)<br>Stage II: 3.9 (2.7-5.3)<br>Stage III: 3.6 (2.6-5.2)<br>Stage IV: 2.5 (1.5-3.6)<br><b>Non-screen-detected cases</b><br>Total: 3.9 (2.1-5.8)<br>Stage I: 4.9 (3.2-6.2)<br>Stage II: 4.8 (3.0-6.0)<br>Stage III: 4.1 (2.6-5.7)<br>Stage IV: 1.5 (0.5-3.1)                                                                                                                                                         | <b>Screen-detected cases</b><br>Total: 3.4 (2.6-4.7)<br>Stage I: 3.6 (2.8-4.8)<br>Stage II: 3.6 (2.7-4.9)<br>Stage III: 3.4 (2.5-4.6)<br>Stage IV: 2.5 (1.5-3.6)<br><b>Non-screen-detected cases</b><br>Total: 3.6 (2.1-5.3)<br>Stage I: 4.0 (2.9-5.5)<br>Stage II: 4.0 (2.8-5.4)<br>Stage III: 3.7 (2.6-4.9)<br>Stage IV: 1.5 (0.5-3.0)                                                                                                                                                         |

<sup>a</sup> For all countries combined, only data from patients aged 60-69 years at diagnosis were included as this was the target group of screening across all included countries.

**Appendix Table 6. Overall survival of colorectal cancer patients at 3 and 5 years after diagnosis according to mode of detection, by country, sex, age, stage, and tumor location.**

| Time, subgroup               | All included countries   |                           |                          | Belgium (2009-2016)      |                           |                          | Denmark (2014-2018)      |                           |                          |
|------------------------------|--------------------------|---------------------------|--------------------------|--------------------------|---------------------------|--------------------------|--------------------------|---------------------------|--------------------------|
|                              | Screen-detected cases    | Non-screen-detected cases | All cases                | Screen-detected cases    | Non-screen-detected cases | All cases                | Screen-detected cases    | Non-screen-detected cases | All cases                |
|                              | OS (95% CI) <sup>a</sup> | OS (95% CI) <sup>a</sup>  | OS (95% CI) <sup>a</sup> | OS (95% CI) <sup>a</sup> | OS (95% CI) <sup>a</sup>  | OS (95% CI) <sup>a</sup> | OS (95% CI) <sup>a</sup> | OS (95% CI) <sup>a</sup>  | OS (95% CI) <sup>a</sup> |
| <b>3 years</b>               |                          |                           |                          |                          |                           |                          |                          |                           |                          |
| <b>Total</b>                 | 89.9 (89.6-90.3)         | 65.8 (65.5-66.1)          | 71.1 (70.9-71.4)         | 91.8 (90.8-92.6)         | 72.8 (72.3-73.3)          | 74.9 (74.4-75.3)         | 89.3 (88.0-90.4)         | 68.1 (67.0-69.1)          | 74.2 (73.3-75.1)         |
| <b>By sex</b>                |                          |                           |                          |                          |                           |                          |                          |                           |                          |
| Male                         | 89.3 (88.8-89.7)         | 64.9 (64.5-65.2)          | 70.6 (70.3-70.9)         | 91.1 (89.9-92.2)         | 71.7 (71.1-72.4)          | 74.0 (73.4-74.6)         | 89.1 (87.4-90.6)         | 66.7 (65.3-68.1)          | 73.4 (72.2-74.5)         |
| Female                       | 91.1 (90.5-91.7)         | 67.3 (66.8-67.7)          | 72.0 (71.6-72.4)         | 93.1 (91.5-94.4)         | 74.5 (73.7-75.2)          | 76.2 (75.5-77.0)         | 89.5 (87.4-91.3)         | 69.9 (68.3-71.6)          | 75.4 (74.1-76.7)         |
| <b>By age at diagnosis</b>   |                          |                           |                          |                          |                           |                          |                          |                           |                          |
| 50-59 years                  | -                        | -                         | -                        | 94.0 (91.3-95.9)         | 77.4 (76.4-78.4)          | 78.4 (77.5-79.4)         | 92.1 (89.3-94.1)         | 73.5 (71.1-75.8)          | 78.7 (76.8-80.5)         |
| 60-69 years                  | 89.9 (89.6-90.3)         | 65.8 (65.5-66.1)          | 71.1 (70.9-71.4)         | 92.3 (91.0-93.4)         | 73.7 (73.0-74.5)          | 75.9 (75.3-76.6)         | 90.1 (88.3-91.7)         | 68.1 (66.5-69.6)          | 74.5 (73.2-75.7)         |
| 70-74 years                  | -                        | -                         | -                        | 90.1 (88.3-91.7)         | 67.1 (66.1-68.1)          | 70.1 (69.2-71.0)         | 86.4 (83.8-88.6)         | 65.0 (63.0-66.9)          | 71.2 (69.6-72.8)         |
| <b>By stage at diagnosis</b> |                          |                           |                          |                          |                           |                          |                          |                           |                          |
| I                            | 96.4 (95.9-96.8)         | 92.2 (91.6-92.7)          | 94.0 (93.7-94.4)         | 96.1 (95.0-96.9)         | 92.1 (91.4-92.7)          | 93.0 (92.4-93.5)         | 95.2 (93.4-96.6)         | 91.5 (89.5-93.1)          | 93.2 (91.9-94.3)         |
| II                           | 94.5 (93.8-95.2)         | 86.8 (86.2-87.3)          | 88.6 (88.1-89.0)         | 94.4 (92.3-95.9)         | 87.5 (86.7-88.2)          | 88.1 (87.3-88.8)         | 93.7 (91.2-95.5)         | 89.3 (87.6-90.7)          | 90.4 (89.1-91.7)         |
| III                          | 89.3 (88.3-90.1)         | 77.0 (76.4-77.7)          | 79.9 (79.3-80.4)         | 91.8 (89.6-93.6)         | 78.7 (77.7-70.6)          | 79.9 (79.0-80.7)         | 87.2 (83.9-89.8)         | 80.0 (77.9-82.0)          | 82.1 (80.3-83.7)         |
| IV                           | 48.4 (45.7-51.1)         | 24.5 (23.9-25.2)          | 26.6 (25.9-27.3)         | 51.9 (45.0-58.4)         | 34.0 (32.8-35.1)          | 34.6 (33.4-35.8)         | 49.9 (42.2-57.1)         | 22.4 (20.4-24.4)          | 25.2 (23.2-27.1)         |
| <b>By tumour location</b>    |                          |                           |                          |                          |                           |                          |                          |                           |                          |
| Proximal colon               | 86.8 (85.9-87.6)         | 62.1 (61.5-62.6)          | 66.4 (66.0-66.9)         | 87.9 (85.3-90.1)         | 68.3 (67.2-69.3)          | 70.0 (69.0-70.9)         | 87.1 (84.2-89.5)         | 63.8 (61.6-65.9)          | 69.8 (68.0-71.6)         |
| Distal colon                 | 92.3 (91.8-92.7)         | 69.0 (68.5-69.6)          | 75.8 (75.4-76.2)         | 93.5 (92.2-94.5)         | 75.1 (74.3-75.9)          | 77.8 (77.1-78.6)         | 91.2 (89.3-92.7)         | 70.6 (68.7-72.4)          | 78.1 (76.6-79.4)         |
| Rectum                       | 89.2 (88.5-89.8)         | 68.6 (68.2-69.1)          | 72.8 (72.4-73.2)         | 91.9 (90.0-93.5)         | 75.0 (74.2-75.9)          | 76.5 (75.7-77.2)         | 88.2 (85.6-90.3)         | 71.4 (69.6-73.1)          | 75.5 (74.0-76.9)         |
| <b>5 years</b>               |                          |                           |                          |                          |                           |                          |                          |                           |                          |
| <b>Total</b>                 | 83.4 (82.9-83.9)         | 57.5 (57.2-57.8)          | 63.1 (62.8-63.4)         | 87.3 (85.5-88.9)         | 63.8 (63.2-64.3)          | 65.9 (65.3-66.4)         | -                        | -                         | -                        |
| <b>By sex</b>                |                          |                           |                          |                          |                           |                          |                          |                           |                          |
| Male                         | 82.4 (81.8-83.0)         | 55.9 (55.5-56.3)          | 61.9 (61.6-62.3)         | 86.2 (83.9-88.3)         | 61.9 (61.1-62.6)          | 64.3 (63.5-65.0)         | -                        | -                         | -                        |
| Female                       | 85.3 (84.5-86.1)         | 60.1 (59.6-60.6)          | 65.0 (64.5-65.4)         | 89.5 (87.0-91.6)         | 66.6 (65.7-67.5)          | 68.4 (67.5-69.2)         | -                        | -                         | -                        |
| <b>By age at diagnosis</b>   |                          |                           |                          |                          |                           |                          |                          |                           |                          |
| 50-59 years                  | -                        | -                         | -                        | 92.4 (88.5-95.0)         | 69.3 (68.1-70.4)          | 70.4 (69.3-71.5)         | -                        | -                         | -                        |
| 60-69 years                  | 83.4 (82.9-83.9)         | 57.5 (57.2-57.8)          | 63.1 (62.8-63.4)         | 87.8 (85.1-90.0)         | 64.8 (63.9-65.6)          | 67.0 (66.2-67.8)         | -                        | -                         | -                        |
| 70-74 years                  | -                        | -                         | -                        | 84.5 (80.5-87.7)         | 57.1 (56.0-58.3)          | 60.2 (59.1-61.3)         | -                        | -                         | -                        |
| <b>By stage at diagnosis</b> |                          |                           |                          |                          |                           |                          |                          |                           |                          |
| I                            | 92.4 (91.6-93.1)         | 86.7 (86.0-87.4)          | 89.1 (88.6-89.6)         | 94.5 (93.1-95.7)         | 86.1 (85.1-87.0)          | 87.3 (86.5-88.1)         | -                        | -                         | -                        |
| II                           | 87.9 (86.6-89.1)         | 79.2 (78.5-80.0)          | 81.2 (80.5-81.8)         | 88.6 (85.1-91.4)         | 80.6 (79.6-81.5)          | 81.1 (80.1-82.0)         | -                        | -                         | -                        |
| III                          | 80.7 (79.3-82.0)         | 66.2 (65.3-66.9)          | 69.4 (68.7-70.1)         | 86.2 (81.3-89.9)         | 69.2 (68.1-70.3)          | 70.5 (69.4-71.5)         | -                        | -                         | -                        |
| IV                           | 32.3 (29.4-35.2)         | 13.9 (13.3-14.5)          | 15.4 (14.8-16.0)         | 35.2 (25.8-44.7)         | 19.1 (18.0-20.1)          | 19.5 (18.5-20.6)         | -                        | -                         | -                        |
| <b>By tumour location</b>    |                          |                           |                          |                          |                           |                          |                          |                           |                          |
| Proximal colon               | 80.4 (79.3-81.4)         | 54.8 (54.2-55.4)          | 59.2 (58.7-59.8)         | 82.5 (78.4-85.8)         | 60.5 (59.4-61.6)          | 62.2 (61.1-63.3)         | -                        | -                         | -                        |
| Distal colon                 | 86.7 (86.0-87.3)         | 60.4 (59.8-61.0)          | 67.8 (67.4-68.3)         | 89.2 (86.2-91.6)         | 66.2 (65.2-67.2)          | 69.1 (68.2-70.0)         | -                        | -                         | -                        |
| Rectum                       | 81.5 (80.6-82.3)         | 59.6 (59.1-60.1)          | 64.0 (63.5-64.4)         | 87.4 (84.5-89.7)         | 64.7 (63.7-65.7)          | 66.2 (65.2-67.1)         | -                        | -                         | -                        |

(Appendix Table 6 continues on next page)

Appendix Table 6. Continued.

| Time, subgroup               | England (2006-2015)           |                               |                               | France, 5 regions (2002-2016) <sup>b</sup> |                           |                          | Ireland (2012-2016)      |                           |                          |
|------------------------------|-------------------------------|-------------------------------|-------------------------------|--------------------------------------------|---------------------------|--------------------------|--------------------------|---------------------------|--------------------------|
|                              | Screen-detected cases         | Non-screen-detected cases     | All cases                     | Screen-detected cases                      | Non-screen-detected cases | All cases                | Screen-detected cases    | Non-screen-detected cases | All cases                |
|                              | OS (95% CI) <sup>a</sup>                   | OS (95% CI) <sup>a</sup>  | OS (95% CI) <sup>a</sup> | OS (95% CI) <sup>a</sup> | OS (95% CI) <sup>a</sup>  | OS (95% CI) <sup>a</sup> |
| <b>3 years</b>               |                               |                               |                               |                                            |                           |                          |                          |                           |                          |
| <b>Total</b>                 | 88.5 (88.1-88.9)              | 61.1 (60.8-61.4)              | 66.0 (65.7-66.2)              | 89.7 (88.6-90.7)                           | 67.6 (66.9-68.4)          | 71.8 (71.1-72.4)         | 91.5 (88.9-93.5)         | 70.8 (69.1-72.4)          | 74.2 (72.7-75.7)         |
| <b>By sex</b>                |                               |                               |                               |                                            |                           |                          |                          |                           |                          |
| Male                         | 87.9 (87.4-88.5)              | 60.3 (59.9-60.7)              | 65.6 (65.3-65.9)              | 89.3 (87.9-90.6)                           | 66.0 (65.0-67.0)          | 70.4 (69.6-71.3)         | 90.6 (87.1-93.2)         | 71.1 (68.9-73.1)          | 74.5 (72.6-76.2)         |
| Female                       | 89.6 (88.9-90.3)              | 62.4 (61.9-62.8)              | 66.5 (66.1-67.0)              | 90.4 (88.5-91.9)                           | 70.3 (69.0-71.5)          | 73.9 (72.8-75.0)         | 93.2 (88.8-95.9)         | 70.2 (67.4-72.8)          | 73.8 (71.3-76.1)         |
| <b>By age at diagnosis</b>   |                               |                               |                               |                                            |                           |                          |                          |                           |                          |
| 50-59 years                  | -                             | -                             | -                             | 92.9 (90.7-94.5)                           | 71.2 (69.7-72.6)          | 74.8 (73.5-76.0)         | -                        | -                         | -                        |
| 60-69 years                  | 89.3 (88.8-89.7)              | 63.0 (62.6-63.4)              | 68.6 (68.2-68.9)              | 89.9 (88.3-91.3)                           | 67.9 (66.8-69.1)          | 72.2 (71.2-73.2)         | 91.5 (88.9-93.5)         | 70.8 (69.1-72.4)          | 74.2 (72.7-75.7)         |
| 70-74 years                  | 86.3 (85.4-87.1)              | 58.4 (57.9-58.8)              | 61.7 (61.3-62.1)              | 86.9 (84.6-88.9)                           | 63.8 (62.3-65.3)          | 68.3 (67.0-69.6)         | -                        | -                         | -                        |
| <b>By stage at diagnosis</b> |                               |                               |                               |                                            |                           |                          |                          |                           |                          |
| I                            | 95.9 (95.3-96.5) <sup>c</sup> | 90.0 (89.2-90.7)              | 92.5 (91.9-93.0) <sup>c</sup> | 96.1 (94.9-97.0)                           | 92.6 (91.6-93.5)          | 93.8 (93.0-94.4)         | 94.9 (90.0-97.5)         | 94.9 (91.7-96.9)          | 94.9 (92.4-96.6)         |
| II                           | 93.4 (92.4-94.2) <sup>c</sup> | 83.4 (82.7-84.2)              | 85.9 (85.2-86.5) <sup>c</sup> | 96.1 (94.5-97.3)                           | 88.4 (87.3-89.4)          | 89.8 (88.9-90.7)         | 92.7 (85.9-96.3)         | 90.2 (87.2-92.5)          | 90.6 (88.0-92.7)         |
| III                          | 87.3 (86.1-88.4) <sup>c</sup> | 71.7 (70.8-72.5)              | 75.4 (74.7-76.1) <sup>c</sup> | 90.6 (88.1-92.5)                           | 80.8 (79.4-82.1)          | 82.6 (81.4-83.7)         | 96.0 (91.3-98.2)         | 82.8 (80.0-85.1)          | 84.7 (82.2-86.8)         |
| IV                           | 43.8 (40.5-46.9) <sup>c</sup> | 17.4 (16.7-18.2)              | 19.5 (18.8-20.3) <sup>c</sup> | 46.2 (40.6-51.7)                           | 27.2 (25.9-28.6)          | 28.5 (27.2-29.9)         | 54.1 (37.2-68.3)         | 21.9 (18.8-25.1)          | 23.7 (20.6-26.9)         |
| <b>By tumour location</b>    |                               |                               |                               |                                            |                           |                          |                          |                           |                          |
| Proximal colon               | 85.2 (84.2-86.1)              | 58.6 (58.1-59.1)              | 62.3 (61.8-62.8)              | 87.8 (85.5-89.8)                           | 65.1 (63.6-66.5)          | 69.2 (67.9-70.4)         | 90.7 (84.8-94.4)         | 66.3 (63.1-69.3)          | 70.0 (67.1-72.7)         |
| Distal colon                 | 91.0 (90.4-91.6)              | 63.8 (63.2-64.3)              | 70.3 (69.9-70.8)              | 91.8 (90.1-93.2)                           | 70.1 (68.7-71.5)          | 75.0 (73.8-76.1)         | 91.9 (87.6-94.8)         | 72.9 (69.6-75.8)          | 77.3 (74.6-79.7)         |
| Rectum                       | 88.0 (87.3-88.7)              | 64.5 (64.0-65.0)              | 68.5 (68.1-69.0)              | 89.0 (86.9-90.7)                           | 68.4 (67.1-69.6)          | 71.8 (70.7-72.8)         | 91.0 (85.6-94.4)         | 74.0 (71.3-76.5)          | 76.3 (73.9-78.6)         |
| <b>5 years</b>               |                               |                               |                               |                                            |                           |                          |                          |                           |                          |
| <b>Total</b>                 | 81.9 (81.4-82.4)              | 53.0 (52.7-53.3)              | 58.1 (57.8-58.4)              | 82.9 (81.5-84.2)                           | 57.6 (56.8-58.4)          | 62.3 (61.6-63.1)         | 85.0 (79.9-88.9)         | 62.3 (60.3-64.2)          | 65.8 (64.0-67.6)         |
| <b>By sex</b>                |                               |                               |                               |                                            |                           |                          |                          |                           |                          |
| Male                         | 80.9 (80.2-81.5)              | 51.5 (51.1-51.9)              | 57.1 (56.7-57.4)              | 82.7 (81.0-84.4)                           | 55.3 (54.2-56.3)          | 60.5 (59.6-61.5)         | 83.5 (76.6-88.5)         | 61.9 (59.3-64.3)          | 65.4 (63.0-67.6)         |
| Female                       | 84.0 (83.1-84.8)              | 55.3 (54.9-55.8)              | 59.7 (59.3-60.1)              | 83.1 (80.8-85.2)                           | 61.4 (60.1-62.8)          | 65.4 (64.2-66.6)         | 87.9 (79.5-93.0)         | 62.9 (59.7-65.9)          | 66.6 (63.7-69.3)         |
| <b>By age at diagnosis</b>   |                               |                               |                               |                                            |                           |                          |                          |                           |                          |
| 50-59 years                  | -                             | -                             | -                             | 85.8 (83.0-88.3)                           | 62.6 (61.0-64.2)          | 66.5 (65.0-67.9)         | -                        | -                         | -                        |
| 60-69 years                  | 83.0 (82.4-83.6)              | 55.3 (54.9-55.7)              | 61.1 (60.8-61.4)              | 83.1 (81.1-85.0)                           | 57.6 (56.3-58.8)          | 62.6 (61.5-63.7)         | 85.0 (79.9-88.9)         | 62.3 (60.3-64.2)          | 65.8 (64.0-67.6)         |
| 70-74 years                  | 78.6 (77.5-79.7)              | 49.7 (49.2-50.2)              | 53.1 (52.6-53.5)              | 80.2 (77.4-82.6)                           | 52.9 (51.3-54.5)          | 58.2 (56.7-59.6)         | -                        | -                         | -                        |
| <b>By stage at diagnosis</b> |                               |                               |                               |                                            |                           |                          |                          |                           |                          |
| I                            | 92.0 (91.0-92.8) <sup>c</sup> | 84.2 (83.1-85.2) <sup>c</sup> | 87.4 (86.7-88.1) <sup>c</sup> | 92.7 (91.1-94.0)                           | 86.0 (84.6-87.3)          | 88.2 (87.1-89.2)         | 87.7 (69.3-95.4)         | 90.7 (86.3-93.7)          | 90.7 (87.0-93.4)         |
| II                           | 87.1 (85.8-88.4) <sup>c</sup> | 75.5 (74.6-76.4) <sup>c</sup> | 78.4 (77.6-79.1) <sup>c</sup> | 91.0 (88.6-92.9)                           | 81.0 (79.5-82.3)          | 82.9 (81.6-84.1)         | 85.9 (70.0-93.7)         | 82.8 (78.6-86.3)          | 83.4 (79.6-86.6)         |
| III                          | 78.5 (77.0-80.0) <sup>c</sup> | 60.2 (59.3-61.2) <sup>c</sup> | 64.6 (63.7-65.4) <sup>c</sup> | 81.4 (78.3-84.2)                           | 68.4 (66.6-70.0)          | 70.8 (69.3-72.2)         | 85.5 (70.9-93.1)         | 71.5 (67.8-74.9)          | 73.4 (69.9-76.6)         |
| IV                           | 32.1 (28.9-35.2) <sup>c</sup> | 10.6 (10.0-11.2) <sup>c</sup> | 12.3 (11.7-13.0) <sup>c</sup> | 23.9 (18.9-29.2)                           | 14.5 (13.4-15.6)          | 15.1 (14.0-16.3)         | 34.9 (18.3-52.2)         | 12.5 (9.7-15.6)           | 13.6 (10.7-16.7)         |
| <b>By tumour location</b>    |                               |                               |                               |                                            |                           |                          |                          |                           |                          |
| Proximal colon               | 78.8 (77.6-79.9)              | 51.5 (51.0-52.1)              | 55.3 (54.8-55.8)              | 82.0 (79.3-84.4)                           | 56.3 (54.7-57.8)          | 60.9 (59.5-62.3)         | 89.6 (83.1-93.7)         | 58.5 (54.9-62.0)          | 70.0 (67.1-72.7)         |
| Distal colon                 | 85.1 (84.3-85.8)              | 55.2 (54.6-55.8)              | 62.4 (61.9-62.9)              | 85.9 (83.7-87.8)                           | 59.8 (58.2-61.3)          | 65.7 (64.4-67.0)         | 87.9 (80.1-92.8)         | 63.0 (59.2-66.6)          | 68.1 (64.7-71.2)         |
| Rectum                       | 80.5 (79.6-81.3)              | 55.5 (55.0-56.0)              | 59.8 (59.3-60.2)              | 80.2 (77.6-82.6)                           | 57.6 (56.3-59.0)          | 61.4 (60.1-62.6)         | 77.1 (65.1-85.4)         | 65.5 (62.3-68.5)          | 67.3 (64.3-70.2)         |

(Appendix Table 6 continues on next page)



Appendix Table 6. Continued.

| Time, subgroup               | Italy, Turin (2003-2014)      |                               |                               | Netherlands (2015)            |                               |                               | Slovenia (2009-2015)     |                           |                          |
|------------------------------|-------------------------------|-------------------------------|-------------------------------|-------------------------------|-------------------------------|-------------------------------|--------------------------|---------------------------|--------------------------|
|                              | Screen-detected cases         | Non-screen-detected cases     | All cases                     | Screen-detected cases         | Non-screen-detected cases     | All cases                     | Screen-detected cases    | Non-screen-detected cases | All cases                |
|                              | OS (95% CI) <sup>a</sup>      | OS (95% CI) <sup>a</sup> | OS (95% CI) <sup>a</sup>  | OS (95% CI) <sup>a</sup> |
| <b>3 years</b>               |                               |                               |                               |                               |                               |                               |                          |                           |                          |
| Total                        | 89.6 (85.9-92.4)              | 69.1 (67.0-71.1)              | 72.2 (70.3-73.9)              | 90.7 (89.5-91.8)              | 68.0 (66.5-69.4)              | 77.1 (76.1-78.1)              | 89.7 (88.2-91.0)         | 62.8 (61.0-64.6)          | 73.3 (72.0-74.5)         |
| <b>By sex</b>                |                               |                               |                               |                               |                               |                               |                          |                           |                          |
| Male                         | 88.4 (83.3-92.0)              | 66.7 (63.9-69.4)              | 70.2 (67.7-72.5)              | 91.1 (89.7-92.4)              | 67.7 (65.8-69.6)              | 77.4 (76.0-78.6)              | 87.5 (85.5-89.3)         | 61.2 (58.9-63.3)          | 71.1 (69.4-72.7)         |
| Female                       | 91.4 (85.4-95.0)              | 72.2 (69.2-75.1)              | 74.8 (72.0-77.3)              | 90.1 (87.8-91.9)              | 68.3 (66.0-70.5)              | 76.8 (75.1-78.4)              | 93.4 (91.2-95.1)         | 66.2 (63.0-69.1)          | 77.4 (75.2-79.4)         |
| <b>By age at diagnosis</b>   |                               |                               |                               |                               |                               |                               |                          |                           |                          |
| 50-59 years                  | -                             | -                             | -                             | -                             | -                             | -                             | 91.2 (88.8-93.1)         | 65.1 (62.1-68.0)          | 75.6 (73.5-77.6)         |
| 60-69 years                  | 89.6 (85.9-92.4) <sup>d</sup> | 69.1 (67.0-71.1) <sup>d</sup> | 72.2 (70.3-73.9) <sup>d</sup> | 91.6 (90.4-92.7)              | 69.3 (67.3-71.2)              | 80.8 (79.6-82.0)              | 88.7 (86.7-90.5)         | 61.5 (59.2-63.7)          | 71.8 (70.2-73.4)         |
| 70-74 years                  | -                             | -                             | -                             | 85.5 (81.2-88.8) <sup>e</sup> | 66.4 (64.3-68.5) <sup>e</sup> | 69.7 (67.7-71.5) <sup>e</sup> | -                        | -                         | -                        |
| <b>By stage at diagnosis</b> |                               |                               |                               |                               |                               |                               |                          |                           |                          |
| I                            | -                             | -                             | -                             | 95.7 (94.3-96.8)              | 93.1 (90.9-94.7)              | 94.7 (93.6-95.7)              | 95.9 (94.3-97.0)         | 93.0 (90.3-95.0)          | 94.8 (93.5-95.9)         |
| II                           | -                             | -                             | -                             | 94.6 (92.1-96.3)              | 85.1 (82.8-87.1)              | 88.5 (86.8-89.9)              | 94.6 (91.6-96.5)         | 85.0 (82.2-87.4)          | 88.1 (86.0-89.8)         |
| III                          | -                             | -                             | -                             | 88.4 (85.6-90.7)              | 78.3 (75.9-80.5)              | 81.8 (80.0-83.5)              | 87.3 (83.6-90.2)         | 71.0 (67.5-74.2)          | 76.8 (74.2-79.2)         |
| IV                           | -                             | -                             | -                             | 48.0 (40.4-55.1)              | 20.3 (17.3-23.5)              | 24.1 (21.3-27.1)              | 40.8 (32.3-49.1)         | 21.2 (18.3-24.1)          | 24.0 (21.3-26.9)         |
| <b>By tumour location</b>    |                               |                               |                               |                               |                               |                               |                          |                           |                          |
| Proximal colon               | 90.2 (81.4-95.0)              | 67.4 (63.4-71.1)              | 70.3 (66.6-73.6)              | 88.2 (85.4-90.6)              | 62.5 (60.0-64.8)              | 70.8 (68.9-72.6)              | 89.7 (86.0-92.4)         | 60.7 (57.0-64.1)          | 70.0 (67.2-72.6)         |
| Distal colon                 | 92.5 (86.5-95.9)              | 74.1 (70.5-77.4)              | 77.3 (74.2-80.2)              | 91.6 (89.8-93.1)              | 70.7 (68.1-73.1)              | 81.0 (79.3-82.5)              | 90.4 (88.0-92.4)         | 66.3 (63.0-69.4)          | 77.6 (75.4-79.6)         |
| Rectum                       | 88.4 (79.5-93.6)              | 70.1 (66.1-73.7)              | 72.5 (68.9-75.8)              | 91.4 (89.3-93.1)              | 71.5 (68.9-73.9)              | 78.8 (77.0-80.6)              | 89.0 (86.5-91.1)         | 62.2 (59.4-64.8)          | 72.0 (69.9-73.9)         |
| <b>5 years</b>               |                               |                               |                               |                               |                               |                               |                          |                           |                          |
| Total                        | 85.7 (81.5-89.0)              | 61.1 (58.9-63.3)              | 64.8 (62.8-66.7)              | -                             | -                             | -                             | 83.8 (82.0-85.5)         | 53.5 (51.6-55.3)          | 65.3 (63.8-66.6)         |
| <b>By sex</b>                |                               |                               |                               |                               |                               |                               |                          |                           |                          |
| Male                         | 84.4 (78.7-88.6)              | 57.7 (54.7-60.6)              | 62.0 (59.3-64.6)              | -                             | -                             | -                             | 81.1 (78.7-83.3)         | 51.6 (49.3-53.9)          | 62.7 (60.9-64.4)         |
| Female                       | 87.7 (81.0-92.2)              | 65.5 (62.3-68.6)              | 68.6 (65.6-71.4)              | -                             | -                             | -                             | 88.5 (85.7-90.8)         | 57.3 (54.0-60.5)          | 70.1 (67.8-72.4)         |
| <b>By age at diagnosis</b>   |                               |                               |                               |                               |                               |                               |                          |                           |                          |
| 50-59 years                  | -                             | -                             | -                             | -                             | -                             | -                             | 86.9 (84.1-89.2)         | 56.0 (52.9-59.0)          | 68.4 (66.2-70.6)         |
| 60-69 years                  | 85.7 (81.5-89.0) <sup>d</sup> | 61.1 (58.9-63.3) <sup>d</sup> | 64.8 (62.8-66.7) <sup>d</sup> | -                             | -                             | -                             | 81.9 (79.4-84.1)         | 52.1 (49.7-54.4)          | 63.3 (61.5-65.1)         |
| 70-74 years                  | -                             | -                             | -                             | -                             | -                             | -                             | -                        | -                         | -                        |
| <b>By stage at diagnosis</b> |                               |                               |                               |                               |                               |                               |                          |                           |                          |
| I                            | -                             | -                             | -                             | -                             | -                             | -                             | 93.2 (91.2-94.8)         | 87.0 (83.5-89.8)          | 91.0 (89.2-92.4)         |
| II                           | -                             | -                             | -                             | -                             | -                             | -                             | 87.8 (83.7-90.9)         | 76.6 (73.3-79.5)          | 80.2 (77.6-82.5)         |
| III                          | -                             | -                             | -                             | -                             | -                             | -                             | 78.2 (73.7-82.0)         | 57.6 (53.8-61.2)          | 64.9 (62.0-67.7)         |
| IV                           | -                             | -                             | -                             | -                             | -                             | -                             | 24.3 (17.1-32.1)         | 11.5 (9.3-14.0)           | 13.4 (11.2-15.8)         |
| <b>By tumour location</b>    |                               |                               |                               |                               |                               |                               |                          |                           |                          |
| Proximal colon               | 82.6 (72.4-89.3)              | 62.0 (57.9-65.9)              | 64.6 (60.8-68.2)              | -                             | -                             | -                             | 84.2 (79.7-87.8)         | 52.0 (48.2-55.6)          | 62.3 (59.3-65.2)         |
| Distal colon                 | 90.1 (83.5-94.1)              | 65.7 (61.8-69.3)              | 70.0 (66.6-73.2)              | -                             | -                             | -                             | 84.9 (82.0-87.3)         | 57.8 (54.3-61.1)          | 70.4 (68.0-72.7)         |
| Rectum                       | 83.7 (74.0-90.0)              | 59.6 (55.4-63.6)              | 62.9 (59.0-66.5)              | -                             | -                             | -                             | 82.6 (79.6-85.3)         | 51.9 (49.1-54.7)          | 63.1 (60.9-65.2)         |

(Appendix Table 6 continues on next page)

Appendix Table 6. Continued.

| Time, subgroup               | Spain, 4 regions (2006-2016) <sup>b</sup>         |                                                       |                                       |
|------------------------------|---------------------------------------------------|-------------------------------------------------------|---------------------------------------|
|                              | Screen-detected cases<br>OS (95% CI) <sup>a</sup> | Non-screen-detected cases<br>OS (95% CI) <sup>a</sup> | All cases<br>OS (95% CI) <sup>a</sup> |
| <b>3 years</b>               |                                                   |                                                       |                                       |
| <b>Total</b>                 | 90.8 (89.6-91.8)                                  | 70.9 (69.9-72.0)                                      | 76.3 (75.4-77.1)                      |
| <b>By sex</b>                |                                                   |                                                       |                                       |
| Male                         | 89.7 (88.1-91.1)                                  | 70.1 (68.7-71.4)                                      | 75.5 (74.4-76.5)                      |
| Female                       | 92.9 (91.0-94.4)                                  | 72.5 (70.7-74.2)                                      | 77.7 (76.3-79.1)                      |
| <b>By age at diagnosis</b>   |                                                   |                                                       |                                       |
| 50-59 years                  | 91.0 (89.0-92.6)                                  | 72.9 (71.2-74.5)                                      | 78.0 (76.6-79.3)                      |
| 60-69 years                  | 90.6 (89.1-92.0)                                  | 69.7 (68.4-71.0)                                      | 75.3 (74.2-76.3)                      |
| 70-74 years                  | -                                                 | -                                                     | -                                     |
| <b>By stage at diagnosis</b> |                                                   |                                                       |                                       |
| I                            | 96.2 (95.0-97.1)                                  | 90.9 (89.0-92.5)                                      | 93.7 (92.7-94.7)                      |
| II                           | 93.2 (90.3-95.2)                                  | 85.9 (84.0-87.6)                                      | 87.6 (86.0-89.1)                      |
| III                          | 90.3 (87.5-92.5)                                  | 77.5 (75.6-79.4)                                      | 80.6 (79.0-82.2)                      |
| IV                           | 49.6 (41.7-57.1)                                  | 28.4 (26.0-30.8)                                      | 30.7 (28.4-33.0)                      |
| <b>By tumour location</b>    |                                                   |                                                       |                                       |
| Proximal colon               | 89.1 (86.0-91.6)                                  | 68.2 (66.0-70.3)                                      | 72.8 (71.0-74.6)                      |
| Distal colon                 | 91.8 (90.1-93.2)                                  | 71.5 (69.7-73.3)                                      | 78.5 (77.1-79.8)                      |
| Rectum                       | 90.4 (88.1-92.3)                                  | 72.0 (70.2-73.7)                                      | 76.5 (75.0-77.9)                      |
| <b>5 years</b>               |                                                   |                                                       |                                       |
| <b>Total</b>                 | 83.5 (81.6-85.1)                                  | 62.1 (61.0-63.3)                                      | 67.7 (66.7-68.6)                      |
| <b>By sex</b>                |                                                   |                                                       |                                       |
| Male                         | 81.7 (79.4-83.8)                                  | 60.3 (58.8-61.8)                                      | 65.9 (64.7-67.2)                      |
| Female                       | 86.9 (83.9-89.4)                                  | 65.4 (63.5-67.3)                                      | 70.8 (69.2-72.4)                      |
| <b>By age at diagnosis</b>   |                                                   |                                                       |                                       |
| 50-59 years                  | 85.5 (82.6-87.9)                                  | 64.7 (62.7-66.5)                                      | 70.2 (68.5-71.7)                      |
| 60-69 years                  | 82.3 (79.9-84.4)                                  | 60.7 (59.2-62.2)                                      | 66.2 (64.9-67.5)                      |
| 70-74 years                  | -                                                 | -                                                     | -                                     |
| <b>By stage at diagnosis</b> |                                                   |                                                       |                                       |
| I                            | 91.4 (89.2-93.2)                                  | 85.6 (83.2-87.7)                                      | 88.6 (87.0-90.0)                      |
| II                           | 85.6 (81.0-89.1)                                  | 77.8 (75.4-80.0)                                      | 79.6 (77.5-81.5)                      |
| III                          | 82.4 (78.2-85.9)                                  | 67.4 (65.0-69.6)                                      | 70.8 (68.8-72.8)                      |
| IV                           | 26.6 (18.8-35.1)                                  | 16.9 (14.8-19.1)                                      | 18.0 (16.0-20.2)                      |
| <b>By tumour location</b>    |                                                   |                                                       |                                       |
| Proximal colon               | 80.6 (75.7-84.6)                                  | 59.1 (56.7-61.5)                                      | 63.7 (61.6-65.8)                      |
| Distal colon                 | 85.5 (83.0-87.7)                                  | 63.3 (61.3-65.3)                                      | 70.6 (69.0-72.2)                      |
| Rectum                       | 82.6 (79.1-85.6)                                  | 62.8 (60.8-64.7)                                      | 67.4 (65.6-69.0)                      |

OS, overall survival, CI, confidence interval.

<sup>a</sup> Data are presented as survival proportion (%).

<sup>b</sup> The specific years for which data were included from each French and Spanish region are provided in table 1.

<sup>c</sup> For England, data on stage were only available from 2012 onwards. Therefore, patients diagnosed in 2009-2011 were not included in analyses of stage.

<sup>d</sup> Age group 58-64 years.

<sup>e</sup> Age group 70-75 years.

**Appendix Table 7. Disease-specific survival of colorectal cancer patients at 3 and 5 years after diagnosis according to mode of detection, by country, sex, age, stage, and tumor location.**

| Time, subgroup               | All included countries    |                           |                           | England (2006-2015)           |                               |                               | Ireland (2012-2016)       |                           |                           |
|------------------------------|---------------------------|---------------------------|---------------------------|-------------------------------|-------------------------------|-------------------------------|---------------------------|---------------------------|---------------------------|
|                              | Screen-detected cases     | Non-screen-detected cases | All cases                 | Screen-detected cases         | Non-screen-detected cases     | All cases                     | Screen-detected cases     | Non-screen-detected cases | All cases                 |
|                              | DSS (95% CI) <sup>a</sup>     | DSS (95% CI) <sup>a</sup>     | DSS (95% CI) <sup>a</sup>     | DSS (95% CI) <sup>a</sup> | DSS (95% CI) <sup>a</sup> | DSS (95% CI) <sup>a</sup> |
| <b>3 years</b>               |                           |                           |                           |                               |                               |                               |                           |                           |                           |
| <b>Total</b>                 | 93.1 (92.7-93.4)          | 71.8 (71.4-72.1)          | 76.6 (76.3-76.8)          | 92.7 (92.4-93.0)              | 70.5 (70.2-70.8)              | 74.6 (74.4-74.9)              | 95.2 (93.0-96.7)          | 74.6 (72.9-76.2)          | 78.0 (76.6-79.4)          |
| <b>By sex</b>                |                           |                           |                           |                               |                               |                               |                           |                           |                           |
| Male                         | 92.8 (92.4-93.3)          | 71.1 (70.7-71.6)          | 76.4 (76.1-76.8)          | 92.6 (92.1-93.0)              | 70.0 (69.7-70.4)              | 74.5 (74.2-74.9)              | 95.0 (92.1-96.8)          | 75.7 (73.7-77.7)          | 79.1 (77.3-80.8)          |
| Female                       | 93.5 (92.9-94.0)          | 72.7 (72.1-73.2)          | 76.8 (76.4-77.3)          | 93.0 (92.4-93.5)              | 71.2 (70.8-71.7)              | 74.7 (74.3-75.1)              | 95.6 (91.7-97.7)          | 72.6 (69.8-75.2)          | 76.3 (73.8-78.5)          |
| <b>By age at diagnosis</b>   |                           |                           |                           |                               |                               |                               |                           |                           |                           |
| 50-59 years                  | -                         | -                         | -                         | -                             | -                             | -                             | -                         | -                         | -                         |
| 60-69 years                  | 93.1 (92.7-93.4)          | 71.8 (71.4-72.1)          | 76.6 (76.3-76.8)          | 92.9 (92.5-93.3)              | 71.4 (71.0-71.7)              | 76.1 (75.8-76.4)              | 95.2 (93.0-96.7)          | 74.6 (72.9-76.2)          | 78.0 (76.6-79.4)          |
| 70-74 years                  | -                         | -                         | -                         | 92.0 (91.2-92.7)              | 69.2 (68.8-69.7)              | 72.1 (71.7-72.5)              | -                         | -                         | -                         |
| <b>By stage at diagnosis</b> |                           |                           |                           |                               |                               |                               |                           |                           |                           |
| I                            | 98.9 (98.6-99.2)          | 97.2 (96.6-97.6)          | 98.0 (97.7-98.3)          | 98.8 (98.4-99.1) <sup>b</sup> | 96.5 (96.0-97.0) <sup>b</sup> | 97.5 (97.2-97.8) <sup>b</sup> | 98.5 (94.0-99.6)          | 99.0 (97.0-99.7)          | 98.9 (97.3-99.5)          |
| II                           | 96.9 (96.1-97.5)          | 91.5 (90.8-92.1)          | 92.9 (92.4-93.4)          | 96.6 (95.9-97.2) <sup>b</sup> | 90.7 (90.1-91.3) <sup>b</sup> | 92.2 (91.7-92.7) <sup>b</sup> | 97.3 (91.8-99.1)          | 93.5 (90.9-95.3)          | 94.1 (91.9-95.7)          |
| III                          | 92.1 (91.1-93.0)          | 81.4 (80.6-82.2)          | 84.3 (83.6-84.9)          | 91.8 (90.8-92.6) <sup>b</sup> | 79.5 (78.7-80.3) <sup>b</sup> | 82.4 (81.8-83.1) <sup>b</sup> | 96.0 (91.3-98.2)          | 85.8 (83.2-88.0)          | 87.3 (85.1-89.3)          |
| IV                           | 51.2 (47.6-54.7)          | 25.8 (24.8-26.8)          | 28.3 (27.3-29.4)          | 50.1 (46.7-53.5) <sup>b</sup> | 24.2 (23.3-25.2) <sup>b</sup> | 26.5 (25.6-27.5) <sup>b</sup> | 58.9 (41.0-73.0)          | 24.2 (20.8-27.7)          | 26.1 (22.8-29.6)          |
| <b>By tumour location</b>    |                           |                           |                           |                               |                               |                               |                           |                           |                           |
| Proximal colon               | 90.6 (89.7-91.5)          | 68.8 (68.2-69.4)          | 72.7 (72.1-73.2)          | 90.4 (89.6-91.2)              | 68.4 (67.9-69.0)              | 73.0 (72.3-73.7)              | 93.9 (88.6-96.8)          | 70.4 (67.3-73.4)          | 74.0 (71.1-76.6)          |
| Distal colon                 | 95.0 (94.5-95.5)          | 74.7 (74.1-75.4)          | 80.9 (80.4-81.4)          | 94.7 (94.2-95.1)              | 73.3 (72.8-73.8)              | 79.5 (78.8-80.2)              | 95.7 (92.0-97.6)          | 76.0 (72.9-78.8)          | 80.5 (78.0-82.8)          |
| Rectum                       | 92.3 (91.7-92.9)          | 73.7 (73.2-74.3)          | 77.7 (77.3-78.1)          | 92.1 (91.4-92.6)              | 72.4 (71.9-72.8)              | 77.9 (77.2-78.5)              | 95.3 (90.8-97.6)          | 77.6 (75.0-80.0)          | 80.0 (77.7-82.1)          |
| <b>5 years</b>               |                           |                           |                           |                               |                               |                               |                           |                           |                           |
| <b>Total</b>                 | 89.2 (88.8-89.7)          | 65.7 (65.4-66.1)          | 71.1 (70.7-71.4)          | 89.0 (88.5-89.3)              | 64.7 (64.4-65.0)              | 69.2 (68.9-69.5)              | 92.5 (89.5-94.7)          | 67.4 (65.5-69.3)          | 71.2 (69.5-72.9)          |
| <b>By sex</b>                |                           |                           |                           |                               |                               |                               |                           |                           |                           |
| Male                         | 89.0 (88.4-89.5)          | 64.7 (64.2-65.1)          | 70.6 (70.2-70.9)          | 88.7 (88.2-89.2)              | 63.7 (63.3-64.1)              | 68.8 (68.4-69.1)              | 92.5 (88.7-95.1)          | 68.0 (65.5-70.4)          | 71.8 (69.5-73.9)          |
| Female                       | 89.8 (89.0-90.5)          | 67.4 (66.8-67.9)          | 71.8 (71.4-72.3)          | 89.4 (88.7-90.1)              | 66.1 (65.7-66.6)              | 69.9 (69.5-70.3)              | 92.5 (86.7-95.9)          | 66.4 (63.3-69.3)          | 70.2 (67.4-72.9)          |
| <b>By age at diagnosis</b>   |                           |                           |                           |                               |                               |                               |                           |                           |                           |
| 50-59 years                  | -                         | -                         | -                         | -                             | -                             | -                             | -                         | -                         | -                         |
| 60-69 years                  | 89.2 (88.8-89.7)          | 65.7 (65.4-66.1)          | 71.1 (70.7-71.4)          | 89.2 (88.7-89.7)              | 65.5 (65.1-65.9)              | 70.7 (70.4-71.0)              | 92.5 (89.5-94.7)          | 67.4 (65.5-69.3)          | 71.2 (69.5-72.9)          |
| 70-74 years                  | -                         | -                         | -                         | 88.3 (87.3-89.1)              | 63.6 (63.1-64.1)              | 66.7 (66.2-67.1)              | -                         | -                         | -                         |
| <b>By stage at diagnosis</b> |                           |                           |                           |                               |                               |                               |                           |                           |                           |
| I                            | 97.9 (97.3-98.3)          | 95.4 (94.7-96.0)          | 96.6 (96.2-97.0)          | 97.9 (97.3-98.3) <sup>b</sup> | 94.7 (94.0-95.3) <sup>b</sup> | 96.1 (95.6-96.4) <sup>b</sup> | 97.0 (90.4-99.1)          | 98.0 (95.3-99.2)          | 97.8 (95.5-98.9)          |
| II                           | 93.6 (92.4-94.6)          | 87.0 (86.1-87.9)          | 88.8 (88.1-89.5)          | 94.2 (93.2-95.0) <sup>b</sup> | 87.0 (86.2-87.7) <sup>b</sup> | 88.8 (88.2-89.4) <sup>b</sup> | 95.4 (87.6-98.4)          | 88.6 (84.8-91.4)          | 89.5 (86.2-92.1)          |
| III                          | 86.4 (84.9-87.6)          | 72.7 (71.7-73.8)          | 76.3 (75.5-77.2)          | 86.3 (84.9-87.5) <sup>b</sup> | 70.8 (69.8-71.7) <sup>b</sup> | 74.5 (73.7-75.3) <sup>b</sup> | 93.7 (85.2-97.4)          | 76.0 (72.4-79.1)          | 78.0 (74.7-80.9)          |
| IV                           | 38.1 (34.4-41.7)          | 16.4 (15.5-17.4)          | 18.6 (17.7-19.6)          | 39.2 (35.7-42.7) <sup>b</sup> | 16.3 (15.5-17.2) <sup>b</sup> | 18.4 (17.6-19.3) <sup>b</sup> | 38.0 (19.9-56.0)          | 13.8 (10.8-17.2)          | 15.0 (11.9-18.4)          |
| <b>By tumour location</b>    |                           |                           |                           |                               |                               |                               |                           |                           |                           |
| Proximal colon               | 87.4 (86.4-88.4)          | 63.9 (63.2-64.5)          | 68.0 (67.4-68.6)          | 87.2 (86.2-88.1)              | 63.9 (63.3-64.4)              | 68.9 (68.1-69.6)              | 92.8 (86.8-96.1)          | 64.7 (61.1-68.0)          | 68.4 (65.2-71.5)          |
| Distal colon                 | 91.8 (91.2-92.4)          | 68.5 (67.8-69.1)          | 75.6 (75.0-76.1)          | 91.4 (90.8-92.0)              | 67.2 (66.6-67.8)              | 74.3 (73.5-75.1)              | 94.0 (89.4-96.7)          | 67.1 (63.3-70.6)          | 72.5 (69.2-75.5)          |
| Rectum                       | 87.4 (86.5-88.1)          | 67.0 (66.4-67.6)          | 71.3 (70.8-71.8)          | 87.5 (86.7-88.2)              | 65.7 (65.2-66.2)              | 71.6 (70.9-72.4)              | 89.7 (82.1-94.1)          | 70.1 (67.0-73.0)          | 72.6 (69.7-75.2)          |

(Appendix Table 7 continues on next page)

Appendix Table 7. Continued.

| Time, subgroup               | Italy, Turin (2003-2014)      |                               |                               | Slovenia (2009-2015)      |                           |                           | Spain, 3 regions (2009-2016) <sup>d</sup> |                           |                           |
|------------------------------|-------------------------------|-------------------------------|-------------------------------|---------------------------|---------------------------|---------------------------|-------------------------------------------|---------------------------|---------------------------|
|                              | Screen-detected cases         | Non-screen-detected cases     | All cases                     | Screen-detected cases     | Non-screen-detected cases | All cases                 | Screen-detected cases                     | Non-screen-detected cases | All cases                 |
|                              | DSS (95% CI) <sup>a</sup>     | DSS (95% CI) <sup>a</sup>     | DSS (95% CI) <sup>a</sup>     | DSS (95% CI) <sup>a</sup> | DSS (95% CI) <sup>a</sup> | DSS (95% CI) <sup>a</sup> | DSS (95% CI) <sup>a</sup>                 | DSS (95% CI) <sup>a</sup> | DSS (95% CI) <sup>a</sup> |
| <b>3 years</b>               |                               |                               |                               |                           |                           |                           |                                           |                           |                           |
| <b>Total</b>                 | 95.5 (92.6-97.3)              | 75.6 (73.6-77.4)              | 78.6 (76.8-80.2)              | 91.7 (90.3-92.9)          | 66.3 (64.5-68.1)          | 76.3 (75.0-77.5)          | 94.5 (93.5-95.3)                          | 78.1 (76.9-79.2)          | 83.3 (82.5-84.2)          |
| <b>By sex</b>                |                               |                               |                               |                           |                           |                           |                                           |                           |                           |
| Male                         | 95.4 (91.4-97.6)              | 73.2 (70.4-75.7)              | 76.8 (74.3-79.0)              | 90.1 (88.2-91.7)          | 65.1 (62.9-67.3)          | 74.6 (73.0-76.2)          | 94.3 (93.0-95.4)                          | 78.1 (76.6-79.4)          | 83.3 (82.3-84.4)          |
| Female                       | 95.5 (90.3-98.0)              | 78.6 (75.6-81.2)              | 80.9 (78.3-83.3)              | 94.4 (92.3-95.9)          | 68.7 (65.6-71.6)          | 79.3 (77.2-81.3)          | 94.8 (93.0-96.2)                          | 78.1 (76.1-80.0)          | 83.4 (81.9-84.7)          |
| <b>By age at diagnosis</b>   |                               |                               |                               |                           |                           |                           |                                           |                           |                           |
| 50-59 years                  | -                             | -                             | -                             | 92.3 (90.0-94.1)          | 67.8 (64.8-70.6)          | 77.8 (75.7-79.7)          | 94.7 (93.0-96.0)                          | 78.7 (76.8-80.5)          | 83.9 (82.5-85.2)          |
| 60-69 years                  | 95.5 (92.6-97.3) <sup>c</sup> | 75.6 (73.6-77.4) <sup>c</sup> | 78.6 (76.8-80.2) <sup>c</sup> | 91.3 (89.4-92.8)          | 65.5 (63.2-67.7)          | 75.4 (73.7-76.9)          | 94.3 (93.0-95.4)                          | 77.7 (76.3-79.1)          | 83.0 (81.9-84.1)          |
| 70-74 years                  | -                             | -                             | -                             | -                         | -                         | -                         | -                                         | -                         | -                         |
| <b>By stage at diagnosis</b> |                               |                               |                               |                           |                           |                           |                                           |                           |                           |
| I                            | -                             | -                             | -                             | 98.1 (96.9-98.9)          | 96.3 (94.1-97.7)          | 97.4 (96.4-98.2)          | 99.0 (98.2-99.4)                          | 98.3 (97.1-99.0)          | 98.7 (98.1-99.2)          |
| II                           | -                             | -                             | -                             | 96.5 (93.9-98.0)          | 88.6 (86.0-90.7)          | 91.1 (89.3-92.7)          | 97.1 (94.8-98.4)                          | 94.5 (92.8-95.8)          | 95.3 (94.0-96.3)          |
| III                          | -                             | -                             | -                             | 89.1 (85.5-91.8)          | 74.8 (71.4-77.9)          | 80.0 (77.4-82.3)          | 92.6 (89.8-94.6)                          | 85.7 (83.5-87.5)          | 87.8 (86.1-89.3)          |
| IV                           | -                             | -                             | -                             | 42.1 (33.3-50.6)          | 23.0 (19.9-26.1)          | 25.8 (22.9-28.8)          | 53.5 (44.7-61.4)                          | 32.6 (29.7-35.5)          | 35.2 (32.4-38.0)          |
| <b>By tumour location</b>    |                               |                               |                               |                           |                           |                           |                                           |                           |                           |
| Proximal colon               | 92.5 (84.1-96.6)              | 73.9 (70.0-77.4)              | 76.3 (72.8-79.5)              | 91.3 (87.7-93.8)          | 64.0 (60.4-67.5)          | 72.9 (70.1-75.5)          | 91.7 (88.7-94.0)                          | 76.7 (74.3-78.9)          | 80.6 (78.7-82.4)          |
| Distal colon                 | 97.6 (92.7-99.2)              | 80.1 (76.6-83.1)              | 83.2 (80.3-85.7)              | 93.1 (91.0-94.8)          | 69.6 (66.3-72.7)          | 80.7 (78.6-82.6)          | 95.4 (93.9-96.4)                          | 79.5 (77.5-81.4)          | 85.9 (84.6-87.1)          |
| Rectum                       | 96.2 (88.8-98.8)              | 77.3 (73.4-80.6)              | 79.8 (76.4-82.8)              | 90.4 (88.0-92.4)          | 65.8 (63.0-68.4)          | 74.9 (72.9-76.8)          | 94.6 (92.6-96.1)                          | 77.5 (75.4-79.4)          | 82.4 (80.8-83.9)          |
| <b>5 years</b>               |                               |                               |                               |                           |                           |                           |                                           |                           |                           |
| <b>Total</b>                 | 92.7 (89.1-95.1)              | 69.3 (67.1-71.4)              | 72.8 (70.9-74.7)              | 87.6 (85.8-89.1)          | 58.6 (56.6-60.5)          | 69.9 (68.5-71.3)          | 88.9 (87.0-90.4)                          | 70.9 (69.5-72.3)          | 76.5 (75.4-77.6)          |
| <b>By sex</b>                |                               |                               |                               |                           |                           |                           |                                           |                           |                           |
| Male                         | 91.9 (86.8-95.0)              | 66.5 (63.4-69.3)              | 70.6 (67.9-73.1)              | 85.4 (83.0-87.5)          | 57.5 (55.1-59.9)          | 68.1 (66.3-69.8)          | 88.8 (86.6-90.7)                          | 70.2 (68.5-71.9)          | 76.0 (74.6-77.4)          |
| Female                       | 93.8 (88.0-96.9)              | 72.8 (69.5-75.8)              | 75.7 (72.8-78.4)              | 91.2 (88.6-93.3)          | 60.6 (57.2-63.8)          | 73.3 (70.9-75.5)          | 88.9 (85.5-91.5)                          | 72.2 (69.9-74.3)          | 77.4 (75.5-79.1)          |
| <b>By age at diagnosis</b>   |                               |                               |                               |                           |                           |                           |                                           |                           |                           |
| 50-59 years                  | -                             | -                             | -                             | 88.3 (85.5-90.6)          | 59.3 (56.0-62.4)          | 71.1 (68.8-73.3)          | 88.9 (85.7-91.5)                          | 71.9 (69.6-74.0)          | 77.3 (75.4-79.0)          |
| 60-69 years                  | 92.7 (89.1-95.1) <sup>c</sup> | 69.3 (67.1-71.4) <sup>c</sup> | 72.8 (70.9-74.7) <sup>c</sup> | 87.1 (84.8-89.1)          | 58.2 (55.7-60.5)          | 69.2 (67.4-70.9)          | 88.8 (86.5-90.8)                          | 70.4 (68.6-72.1)          | 76.1 (74.6-77.4)          |
| 70-74 years                  | -                             | -                             | -                             | -                         | -                         | -                         | -                                         | -                         | -                         |
| <b>By stage at diagnosis</b> |                               |                               |                               |                           |                           |                           |                                           |                           |                           |
| I                            | -                             | -                             | -                             | 97.1 (95.5-98.1)          | 92.9 (89.9-95.0)          | 95.5 (94.1-96.6)          | 97.1 (95.3-98.2)                          | 96.7 (94.7-97.9)          | 96.9 (95.7-97.8)          |
| II                           | -                             | -                             | -                             | 91.8 (87.9-94.4)          | 82.8 (79.7-85.5)          | 85.7 (83.3-87.8)          | 90.9 (86.0-94.2)                          | 87.1 (84.2-89.5)          | 88.2 (85.8-90.2)          |
| III                          | -                             | -                             | -                             | 83.0 (78.6-86.5)          | 63.6 (59.7-67.3)          | 70.7 (67.7-73.4)          | 86.4 (81.8-89.9)                          | 78.7 (75.9-81.2)          | 81.0 (78.7-83.1)          |
| IV                           | -                             | -                             | -                             | 25.1 (17.6-33.4)          | 12.2 (9.7-15.0)           | 14.1 (11.7-16.8)          | 28.7 (19.5-38.6)                          | 20.1 (17.2-23.0)          | 21.2 (18.4-24.1)          |
| <b>By tumour location</b>    |                               |                               |                               |                           |                           |                           |                                           |                           |                           |
| Proximal colon               | 88.1 (78.3-93.7)              | 69.8 (65.7-73.6)              | 72.2 (68.4-75.6)              | 88.6 (84.4-91.7)          | 56.8 (52.9-60.5)          | 67.1 (64.1-70.0)          | 86.3 (81.2-90.1)                          | 68.5 (65.6-71.2)          | 72.9 (70.4-75.2)          |
| Distal colon                 | 95.8 (90.1-98.2)              | 73.8 (70.0-77.3)              | 77.8 (74.5-80.7)              | 89.0 (86.3-91.2)          | 62.9 (59.3-66.2)          | 75.1 (72.8-77.3)          | 91.8 (89.6-93.6)                          | 72.8 (70.4-75.0)          | 80.2 (78.5-81.8)          |
| Rectum                       | 92.1 (83.3-96.4)              | 68.4 (64.1-72.3)              | 71.6 (67.7-75.1)              | 85.6 (82.6-88.1)          | 57.1 (54.1-60.0)          | 67.6 (65.3-69.7)          | 85.8 (81.6-89.1)                          | 70.3 (67.9-72.5)          | 74.8 (72.8-76.7)          |

DSS, Disease (colorectal cancer) specific survival, CI, confidence interval.

<sup>a</sup>Data are presented as survival proportion (%).

**Notes to Appendix Table 7. Continued.**

<sup>b</sup> For England, data on stage were only available from 2012 onwards. Therefore, patients diagnosed in 2009-2011 were not included in analyses of stage.

<sup>c</sup> Age group 58-64 years.

<sup>d</sup> The specific years for which data were included from each Spanish region are provided in Table 1.

## References

1. Cancer Screening in the European Union. Report on the implementation of the Council Recommendation on cancer screening. Brussels: European Commission, 2017.
2. Cardoso R, Guo F, Heisser T, Hoffmeister M, Brenner H. Utilisation of Colorectal Cancer Screening Tests in European Countries by Type of Screening Offer: Results from the European Health Interview Survey. *Cancers (Basel)* 2020; **12**(6).
3. Guo F, De Brabander I, Francart J, et al. Benefits of switching from guaiac-based faecal occult blood to faecal immunochemical testing: experience from the Wallonia-Brussels colorectal cancer screening programme. *Br J Cancer* 2020; **122**(7): 1109-17.
4. Center for Cancer Detection - Belgian Cancer Registry. Jaarrapport Bevolkingsonderzoeken naar kanker 2017 [Annual Population Screening Report on Cancer 2017]. [https://dikkedarmkanker.bevolkingsonderzoek.be/sites/default/files/atoms/files/Jaarrapport2017\\_DEF\\_0.pdf](https://dikkedarmkanker.bevolkingsonderzoek.be/sites/default/files/atoms/files/Jaarrapport2017_DEF_0.pdf) (accessed July 2, 2021).
5. Center for Cancer Detection - Belgian Cancer Registry. Jaarrapport Bevolkingsonderzoeken naar kanker 2019 [Annual Population Screening Report on Cancer 2019]. <https://baarmoederhalskanker.bevolkingsonderzoek.be/sites/default/files/atoms/files/Jaarrapport2019.pdf> (accessed July 2, 2021).
6. Toes-Zoutendijk E, Portillo I, Hoeck S, et al. Participation in faecal immunochemical testing-based colorectal cancer screening programmes in the northwest of Europe. *J Med Screen* 2020; **27**(2): 68-76.
7. Njor SH, Friis-Hansen L, Andersen B, et al. Three years of colorectal cancer screening in Denmark. *Cancer Epidemiol* 2018; **57**: 39-44.
8. McGregor LM, Bonello B, Kerrison RS, et al. Uptake of Bowel Scope (Flexible Sigmoidoscopy) Screening in the English National Programme: the first 14 months. *J Med Screen* 2016; **23**(2): 77-82.
9. Jezewski-Serra D, Salines E. Évaluation épidémiologique du programme de dépistage organisé du cancer colorectal en France – Résultats 2009-2010 [Epidemiological evaluation of the organised colorectal cancer screening programme in France – Results 2009-2010]. Saint- Maurice: Institut de veille sanitaire, 2013.
10. Leuraud K, Jezewski-Serra D, Salines E. Évaluation épidémiologique du programme de dépistage organisé du cancer colorectal en France – Première évaluation depuis la généralisation du programme pour 46 départements sur la période 2008-2009 [Epidemiological evaluation of the organised colorectal cancer screening programme in France – First evaluation after roll out of the program through 46 departments over the period 2008-2009]. Saint- Maurice: Institut de veille sanitaire, 2012.
11. National Screening Service. BowelScreen Programme Report Round One 2012-2015. <https://www.screeningservice.ie/publications/BowelScreen-Programme-Report-Round-1-2012-2015.pdf> (accessed April 30, 2021).
12. Senore C, Ederle A, Benazzato L, et al. Offering people a choice for colorectal cancer screening. *Gut* 2013; **62**(5): 735-40.
13. Erasmus MC – NKL / AvL. Colorectal cancer screening programme – Monitor 2015. <https://www.rivm.nl/en/media/70681> (accessed March 15, 2021).
14. Senore C, Basu P, Anttila A, et al. Performance of colorectal cancer screening in the European Union Member States: data from the second European screening report. *Gut* 2019; **68**(7): 1232-44.
15. The Svit Programme – Slovenian National screening and early detection programme for colorectal cancer. Letno poročilo o delovanju Programa Svit za obdobje od 1.1. do 31.12.2015 [Annual Screening Report of the Svit Programme for the period January 1st – December 31st 2015]. (accessed April 26, 2022)
16. Tepeš B, Bracko M, Novak Mlakar D, et al. Results of the FIT-based National Colorectal Cancer Screening Program in Slovenia. *J Clin Gastroenterol* 2017; **51**(6): e52-e9.
17. Idigoras I, Arrospe A, Portillo I, et al. Evaluation of the colorectal cancer screening Programme in the Basque Country (Spain) and its effectiveness based on the Miscan-colon model. *BMC Public Health* 2017; **18**(1): 78.
18. Oficina Tècnica del Programa de Cribratge de Càncer de Còlon i Recte de la Regió Sanitària de Girona [Technical Office of the Colorectal Cancer Screening Program of the Girona Health Region]. Institute of Health Care, Girona. <http://www.ias.cat/ca/contingut/iasgirona/535> (accessed Dec 4, 2020).
19. Indicadores de salud en la Región de Murcia. Evolución anual y situación en 2018 [Health indicators in the Region of Murcia. Annual evolution and situation in 2018]. 2019. [http://www.murciasalud.es/recursos/ficheros/442584-Boletin\\_Mayo-2019.pdf](http://www.murciasalud.es/recursos/ficheros/442584-Boletin_Mayo-2019.pdf) (accessed Aug 7, 2020).
